# Supplementary material for: Transcription Factors in Aureobasidium spp.: Classification, Regulation and a Newly Built Database
Source: MDPI journal article supplement (doi:10.3390/jof8101096), 2022-10-17
Supplement: s1 [file s1]

Supplementary Figure:

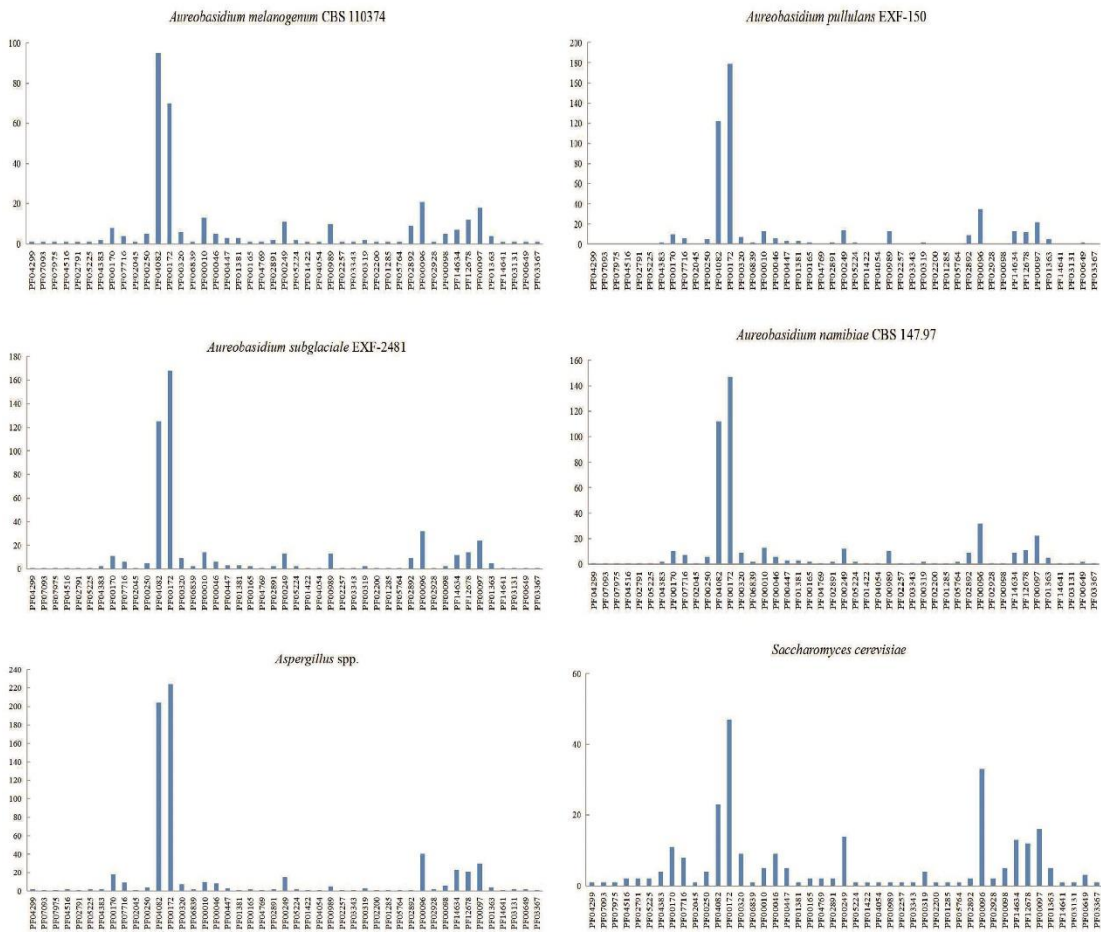

Figure S1. The numbers of the PFAM families in different fungi.

HOMEDownloadKEGGReference

Aureobasidium Transcription Factor Database (ATFDB)

Resources

<http://yeastextract.com/>  
<https://www.ncbi.nlm.nih.gov/assembly/?term=Aureobasidium>  
<http://pfam.xfam.org/>  
<http://rsisfam.org>  
<https://geneexplain.com/transfac/>  
<http://hmmer.org/>

search

Crz1

(use , for multiple retrieve)

| No. | Transcription factors                     | Activation/Repression (+/-) | Binding sites | Functions                                                                                                                                                                      | Types  | Regulation                | Domain                              | Aureobasidium melanogenum CBS110374 (Accession no.) | Aureobasidium sp. bglaciale EXF-2481 (Accession no.) | Aureobasidium pullulans EXF-150 (Accession no.) | Aureobasidium n. mibian CBS 147.97 (Accession no.) | Hidden Markov Models (HMMs) |
|-----|-------------------------------------------|-----------------------------|---------------|--------------------------------------------------------------------------------------------------------------------------------------------------------------------------------|--------|---------------------------|-------------------------------------|-----------------------------------------------------|------------------------------------------------------|-------------------------------------------------|----------------------------------------------------|-----------------------------|
| 39  | Crz1p/Tot1p/Hsl8 (Zinc finger, C2H2 type) | +                           | GNGGC/GTCA    | Transcription factor that activates transcription of genes involved in stress response; nuclear localization is positively regulated by calcineurin-mediated dephosphorylation | Global | Calcium signaling pathway | zH2C2_2 (Zinc-finger double domain) | KE062890.1                                          | XP_013348807.1                                       | KE087890.1                                      | XP_013427718.1                                     | Crz1.hmm                    |

共 1 条10条/页12345678910111213141516171819202122232425262728293031323334353637383940414243444546474849505152535455565758596061626364656667686970717273747576777879808182838485868788899091929394959697989910010110210310410510610710810911011111211311411511611711811912012112212312412512612712812913013113213313413513613713813914014114214314414514614714814915015115215315415515615715815916016116216316416516616716816917017117217317417517617717817918018118218318418518618718818919019119219319419519619719819920020120220320420520620720820921021121221321421521621721821922022122222322422522622722822923023123223323423523623723823924024124224324424524624724824925025125225325425525625725825926026126226326426526626726826927027127227327427527627727827928028128228328428528628728828929029129229329429529629729829930030130230330430530630730830931031131231331431531631731831932032132232332432532632732832933033133233333433533633733833934034134234334434534634734834935035135235335435535635735835936036136236336436536636736836937037137237337437537637737837938038138238338438538638738838939039139239339439539639739839940040140240340440540640740840941041141241341441541641741841942042142242342442542642742842943043143243343443543643743843944044144244344444544644744844945045145245345445545645745845946046146246346446546646746846947047147247347447547647747847948048148248348448548648748848949049149249349449549649749849950050150250350450550650750850951051151251351451551651751851952052152252352452552652752852953053153253353453553653753853954054154254354454554654754854955055155255355455555655755855956056156256356456556656756856957057157257357457557657757857958058158258358458558658758858959059159259359459559659759859960060160260360460560660760860961061161261361461561661761861962062162262362462562662762862963063163263363463563663763863964064164264364464564664764864965065165265365465565665765865966066166266366466566666766866967067167267367467567667767867968068168268368468568668768868969069169269369469569669769869970070170270370470570670770870971071171271371471571671771871972072172272372472572672772872973073173273373473573673773873974074174274374474574674774874975075175275375475575675775875976076176276376476576676776876977077177277377477577677777877978078178278378478578678778878979079179279379479579679779879980080180280380480580680780880981081181281381481581681781881982082182282382482582682782882983083183283383483583683783883984084184284384484584684784884985085185285385485585685785885986086186286386486586686786886987087187287387487587687787887988088188288388488588688788888989089189289389489589689789889990090190290390490590690790890991091191291391491591691791891992092192292392492592692792892993093193293393493593693793893994094194294394494594694794894995095195295395495595695795895996096196296396496596696796896997097197297397497597697797897998098198298398498598698798898999099199299399499599699799899910001001100210031004100510061007100810091010101110121013101410151016101710181019102010211022102310241025102610271028102910301031103210331034103510361037103810391040104110421043104410451046104710481049105010511052105310541055105610571058105910601061106210631064106510661067106810691070107110721073107410751076107710781079108010811082108310841085108610871088108910901091109210931094109510961097109810991100110011002110031100411005110061100711008110091101011011110121101311014110151101611017110181101911020110211102211023110241102511026110271102811029110301103111032110331103411035110361103711038110391104011041110421104311044110451104611047110481104911050110511105211053110541105511056110571105811059110601106111062110631106411065110661106711068110691107011071110721107311074110751107611077110781107911080110811108211083110841108511086110871108811089110901109111092110931109411095110961109711098110991110011100111002111003111004111005111006111007111008111009111010111011110121110131110141110151110161110171110181110191110201110211110221110231110241110251110261110271110281110291110301110311110321110331110341110351110361110371110381110391110401110411110421110431110441110451110461110471110481110491110501110511110521110531110541110551110561110571110581110591110601110611110621110631110641110651110661110671110681110691110701110711110721110731110741110751110761110771110781110791110801110811110821110831110841110851110861110871110881110891110901110911110921110931110941110951110961110971110981110991111001111001111002111100311110041111005111100611110071111008111100911110101111011111012111101311110141111015111101611110171111018111101911110201111021111102211110231111024111102511110261111027111102811110291111030111103111110321111033111103411110351111036111103711110381111039111104011110411111042111104311110441111045111104611110471111048111104911110501111051111105211110531111054111105511110561111057111105811110591111060111106111110621111063111106411110651111066111106711110681111069111107011110711111072111107311110741111075111107611110771111078111107911110801111081111108211110831111084111108511110861111087111108811110891111090111109111110921111093111109411110951111096111109711110981111099111110011111001111100211111003111110041111100511111006111110071111100811111009111110101111101111110121111101311111014111110151111101611111017111110181111101911111020111110211111102211111023111110241111102511111026111110271111102811111029111110301111103111111032111110331111103411111035111110361111103711111038111110391111104011111041111110421111104311111044111110451111104611111047111110481111104911111050111110511111105211111053111110541111105511111056111110571111105811111059111110601111106111111062111110631111106411111065111110661111106711111068111110691111107011111071111110721111107311111074111110751111107611111077111110781111107911111080111110811111108211111083111110841111108511111086111110871111108811111089111110901111109111111092111110931111109411111095111110961111109711111098111110991111110011111100111111002111111003111111004111111005111111006111111007111111008111111009111111010111111011111110121111110131111110141111110151111110161111110171111110181111110191111110201111110211111110221111110231111110241111110251111110261111110271111110281111110291111110301111110311111110321111110331111110341111110351111110361111110371111110381111110391111110401111110411111110421111110431111110441111110451111110461111110471111110481111110491111110501111110511111110521111110531111110541111110551111110561111110571111110581111110591111110601111110611111110621111110631111110641111110651111110661111110671111110681111110691111110701111110711111110721111110731111110741111110751111110761111110771111110781111110791111110801111110811111110821111110831111110841111110851111110861111110871111110881111110891111110901111110911111110921111110931111110941111110951111110961111110971111110981111110991111111001111111001111111002111111100311111110041111111005111111100611111110071111111008111111100911111110101111111011111111012111111101311111110141111111015111111101611111110171111111018111111101911111110201111111021111111102211111110231111111024111111102511111110261111111027111111102811111110291111111030111111103111111110321111111033111111103411111110351111111036111111103711111110381111111039111111104011111110411111111042111111104311111110441111111045111111104611111110471111111048111111104911111110501111111051111111105211111110531111111054111111105511111110561111111057111111105811111110591111111060111111106111111110621111111063111111106411111110651111111066111111106711111110681111111069111111107011111110711111111072111111107311111110741111111075111111107611111110771111111078111111107911111110801111111081111111108211111110831111111084111111108511111110861111111087111111108811111110891111111090111111109111111110921111111093111111109411111110951111111096111111109711111110981111111099111111110011111111001111111100211111111003111111110041111111100511111111006111111110071111111100811111111009111111110101111111101111111101211111111013111111110141111111101511111111016111111110171111111101811111111019111111110201111111102111111110221111111102311111111024111111110251111111102611111111027111111110281111111102911111111030111111110311111111032111111103311111110341111111035111111103611111110371111111038111111103911111110401111111041111111104211111110431111111044111111104511111110461111111047111111104811111110491111111050111111105111111110521111111053111111105411111110551111111056111111105711111110581111111059111111106011111110611111111062111111106311111110641111111065111111106611111110671111111068111111106911111110701111111071111111107211111110731111111074111111107511111110761111111077111111107811111110791111111080111111108111111110821111111083111111108411111110851111111086111111108711111110881111111089111111109011111110911111111092111111109311111110941111111095111111109611111110971111111098111111109911111111001111111100111111110021111111100311111111004111111110051111111100611111111007111111110081111111100911111111010111111110111111110121111111101311111111014111111110151111111101611111111017111111110181111111101911111111020111111110211111111022111111110231111111102411111111025111111110261111111102711111111028111111110291111111103011111111031111111103211111110331111111034111111103511111110361111111037111111103811111110391111111040111111104111111110421111111043111111104411111110451111111046111111104711111110481111111049111111105011111110511111111052111111105311111110541111111055111111105611111110571111111058111111105911111110601111111061111111106211111110631111111064111111106511111110661111111067111111106811111110691111111070111111107111111110721111111073111111107411111110751111111076111111107711111110781111111079111111108011111110811111111082111111108311111110841111111085111111108611111110871111111088111111108911111110901111111091111111109211111110931111111094111111109511111110961111111097111111109811111110991111111100111111110011111111002111111110031111111100411111111005111111110061111111100711111111008111111110091111111101011111111011111111012111111110131111111101411111111015111111110161111111101711111111018111111110191111111102011111111021111111102211111111023111111110241111111102511111111026111111110271111111102811111111029111111110301111111103111111110321111111033111111103411111110351111111036111111103711111110381111111039111111104011111110411111111042111111104311111110441111111045111111104611111110471111111048111111104911111110501111111051111111105211111110531111111054111111105511111110561111111057111111105811111110591111111060111111106111111110621111111063111111106411111110651111111066111111106711111110681111111069111111107011111110711111111072111111107311111110741111111075111111107611111110771111111078111111107911111110801111111081111111108211111110831111111084111111108511111110861111111087111111108811111110891111111090111111109111111110921111111093111111109411111110951111111096111111109711111110981111111099111111110011111111001111111100211111111003111111110041111111100511111111006111111110071111111100811111111009111111110101111111101111111101211111111013111111110141111111101511111111016111111110171111111101811111111019111111110201111111102111111110221111111102311111111024111111110251111111102611111111027111111110281111111102911111111030111111110311111111032111111103311111110341111111035111111103611111110371111111038111111103911111110401111111041111111104211111110431111111044111111104511111110461111111047111111104811111110491111111050111111105111111110521111111053111111105411111110551111111056111111105711111110581111111059111111106011111110611111111062111111106311111110641111111065111111106611111110671111111068111111106911111110701111111071111111107211111110731111111074111111107511111110761111111077111111107811111110791111111080111111108111111110821
