# Supplementary material for: Transcription Factors in Aureobasidium spp.: Classification, Regulation and a Newly Built Database
Source: MDPI journal article supplement (doi:10.3390/jof8101096), 2022-10-17
Supplement: s1 [file s1]

**Supplementary Table:**

**Table S5.** The TFs numbers of *Aureobasidium* spp. in the NCBI (GenBank) and the ATFDDB databases.

| Type         | NCBI (GenBank) | AUREOBASIDIUM TFs |
|--------------|----------------|-------------------|
| General TFs  | 2511           | 322               |
| Global TFs   | 483            | 1386              |
| Specific TFs | 126            | 697               |
