# Supplementary material for: Transcription Factors in Aureobasidium spp.: Classification, Regulation and a Newly Built Database
Source: MDPI journal article supplement (doi:10.3390/jof8101096), 2022-10-17
Supplement: s1 [file s1]

**Supplementary Table:**

**Table S3.** Major zinc finger transcriptional factors in *Aureobasidium* spp.

| Fold Group                                             | PFAM    |
|--------------------------------------------------------|---------|
| Class I: Zinc knuckle (zf-CCHC)                        | PF00098 |
| Class II: Cys2His2 (‘classic zinc finger’)             | PF00096 |
| Class III: Zinc finger, C4 type (two domains)          | PF00105 |
| Class IV: Fungal Zn(2)-Cys(6) binuclear cluster domain | PF00172 |
| Class V: Putative zinc finger motif, C2HC5-type        | PF06221 |
| Class VI: Zinc finger, C3HC4 type (RING finger)        | PF00097 |
| Class VII: TF_Zn_Ribbon (TFIIB zinc-binding)           | PF08271 |
