# Supplementary material for: Transcription Factors in Aureobasidium spp.: Classification, Regulation and a Newly Built Database
Source: MDPI journal article supplement (doi:10.3390/jof8101096), 2022-10-17
Supplement: s1 [file s1]

**Supplementary Table:**

**Table S1.** Accession numbers of the *Aureobasidium* genome sequences included in this study.

| Organism                       | Strain    | Assembly accession | Isolation habitat                                       | Sampling site location        | Reference |
|--------------------------------|-----------|--------------------|---------------------------------------------------------|-------------------------------|-----------|
| <i>Aureobasidium pullulans</i> | EXF-11900 | GCA_004917105.1    | Indoors: kitchen refrigerator rubber seal               | Croatia: Malinska, Krk        | 20        |
| <i>Aureobasidium pullulans</i> | EXF-11318 | GCA_004917135.1    | Plant: apple surface                                    | Slovenia: Horjul              |           |
| <i>Aureobasidium pullulans</i> | EXF-11319 | GCA_004917115.1    | Plant: apple surface                                    | Slovenia: Horjul              |           |
| <i>Aureobasidium pullulans</i> | EXF-11991 | GCA_004917145.1    | Indoors: kitchen refrigerator condensation water outlet | Slovenia: Zagorje ob Savi     |           |
| <i>Aureobasidium pullulans</i> | EXF-11825 | GCA_004917155.1    | Indoors: kitchen freezer rubber seal                    | Slovenia: Bistrica ob Sotli   |           |
| <i>Aureobasidium pullulans</i> | EXF-11014 | GCA_004917165.1    | Plant: commercial biocontrol strain                     | N.D.                          |           |
| <i>Aureobasidium pullulans</i> | EXF-11013 | GCA_004917185.1    | Plant: commercial biocontrol strain                     | N.D.                          |           |
| <i>Aureobasidium pullulans</i> | EXF-10751 | GCA_004917205.1    | Other: cloud sample                                     | France                        |           |
| <i>Aureobasidium pullulans</i> | EXF-11323 | GCA_004917225.1    | Plant: sweet chestnut leaf surface                      | Slovenia: Horjul              |           |
| <i>Aureobasidium pullulans</i> | EXF-10796 | GCA_004917255.1    | Plant: persimmon surface                                | Slovenia                      |           |
| <i>Aureobasidium pullulans</i> | EXF-10659 | GCA_004917275.1    | Indoors: indoor air sample                              | Slovenia: Celje               |           |
| <i>Aureobasidium pullulans</i> | EXF-10632 | GCA_004917305.1    | Other: car diesel reservoir inlet inner surface         | Slovenia: Jezero              |           |
| <i>Aureobasidium pullulans</i> | EXF-10629 | GCA_004917595.1    | Other: car petrol reservoir inlet inner surface         | Slovenia: Jezero              |           |
| <i>Aureobasidium pullulans</i> | EXF-10507 | GCA_004917335.1    | Other: marble block surface                             | Italy: Messina                |           |
| <i>Aureobasidium pullulans</i> | EXF-10085 | GCA_004917355.1    | Indoors: kitchen cutting board surface                  | Slovenia: Planina pri Sevnici |           |
| <i>Aureobasidium pullulans</i> | EXF-10081 | GCA_004917375.1    | Indoors: kitchen sink drain                             | Slovenia: Ljubljana           |           |
| <i>Aureobasidium pullulans</i> | EXF-10080 | GCA_004917605.1    | Indoors: kitchen sink drain                             | Slovenia: Ljubljana           |           |

| Organism                       | Strain   | Assembly accession | Isolation habitat                                                         | Sampling site location                | Reference |
|--------------------------------|----------|--------------------|---------------------------------------------------------------------------|---------------------------------------|-----------|
| <i>Aureobasidium pullulans</i> | EXF-9785 | GCA_004917385.1    | Indoors: Interior of water supply connector                               | Slovenia: Kapla                       | 20        |
| <i>Aureobasidium pullulans</i> | EXF-9399 | GCA_004917415.1    | Plant: grape surface                                                      | Greece: Attica                        |           |
| <i>Aureobasidium pullulans</i> | EXF-8828 | GCA_004917425.1    | Glacial: glacial meltwater                                                | Argentina: San Carlos<br>de Bariloche |           |
| <i>Aureobasidium pullulans</i> | EXF-8128 | GCA_004917435.1    | Plant: maple leaf surface                                                 | Slovenia: Ljubljana                   |           |
| <i>Aureobasidium pullulans</i> | EXF-8127 | GCA_004917445.1    | Indoors: surface of metal bucket used for carrying<br>water               | Slovenia: Cuber                       |           |
| <i>Aureobasidium pullulans</i> | EXF-6604 | GCA_004917485.1    | Plant: roots of <i>Juncus trifidus</i>                                    | Poland: Babia Góra<br>massif          |           |
| <i>Aureobasidium pullulans</i> | EXF-6519 | GCA_004917495.1    | Other: felt on the bottom side of a metal roof tile                       | Slovenia: Mengeš                      |           |
| <i>Aureobasidium pullulans</i> | EXF-6514 | GCA_004917505.1    | Plant: peach bone                                                         | Slovenia                              |           |
| <i>Aureobasidium pullulans</i> | EXF-6298 | GCA_004917525.1    | Indoors: washing powder tray                                              | Slovenia: Postojna                    |           |
| <i>Aureobasidium pullulans</i> | EXF-8841 | GCA_004917615.1    | Plant: Nothofagus pumilio leaf surface                                    | Argentina: San Carlos<br>de Bariloche |           |
| <i>Aureobasidium pullulans</i> | EXF-8126 | GCA_004917625.1    | Indoors: metal surface, basement of pumpkin seed oil<br>pressing facility | Slovenia: Gibina                      |           |
| <i>Aureobasidium pullulans</i> | EXF-6267 | GCA_004917665.1    | Hypersaline: salpan evaporating sea water                                 | Slovenia: Sečovelje                   |           |
| <i>Aureobasidium pullulans</i> | EXF-5628 | GCA_004917685.1    | Indoors: rubber seal                                                      | Slovenia: Blejska<br>Dobrava          |           |
| <i>Aureobasidium pullulans</i> | EXF-4010 | GCA_004917705.1    | Glacial: glacial ice with sediment                                        | Norway: Ny-Ålesund                    |           |
| <i>Aureobasidium pullulans</i> | EXF-4256 | GCA_004917555.1    | Glacial: glacial ice                                                      | Norway: Ny-Ålesund                    |           |
| <i>Aureobasidium pullulans</i> | EXF-3863 | GCA_004917725.1    | Hypersaline: salpans crystalization pond water                            | Slovenia: Sečovelje                   |           |
| <i>Aureobasidium pullulans</i> | EXF-3844 | GCA_004917745.1    | Plant: dried olives                                                       | Slovenia                              |           |
| <i>Aureobasidium pullulans</i> | EXF-3984 | GCA_004917795.1    | Glacial: glacial ice with sediment                                        | Norway: Ny-Ålesund                    |           |
| <i>Aureobasidium pullulans</i> | EXF-1645 | GCA_004917825.1    | Glacial: glacial ice                                                      | Norway: Ny-Ålesund                    |           |

| Organism                         | Strain    | Assembly accession | Isolation habitat                                                       | Sampling site location                 | Reference |
|----------------------------------|-----------|--------------------|-------------------------------------------------------------------------|----------------------------------------|-----------|
| <i>Aureobasidium pullulans</i>   | EXF-1668  | GCA_004918575.1    | Glacial: glacial ice from sea water                                     | Norway: Ny-Ålesund                     | 20        |
| <i>Aureobasidium pullulans</i>   | EXF-3519  | GCA_004918105.1    | Plant: oak leaf surface                                                 | Slovenia: Ljubljana                    |           |
| <i>Aureobasidium pullulans</i>   | EXF-3403  | GCA_004918115.1    | Indoors: fourth block wall surface                                      | Ukraine: Chernobyl                     |           |
| <i>Aureobasidium pullulans</i>   | EXF-3374  | GCA_004918145.1    | Plant: grape surface                                                    | France: Beaujeu                        |           |
| <i>Aureobasidium pullulans</i>   | EXF-3380  | GCA_004918535.1    | Plant: oak slime flux                                                   | Germany: Ohlsdorf,<br>Hamburg          |           |
| <i>Aureobasidium pullulans</i>   | EXF-3358  | GCA_004918165.1    | Other: sea water                                                        | Croatia: Mljet                         |           |
| <i>Aureobasidium pullulans</i>   | EXF-676   | GCA_004918195.1    | Indoors: air conditioner grate for entering air                         | Slovenia: Ljubljana                    |           |
| <i>Aureobasidium pullulans</i>   | EXF-674   | GCA_004918505.1    | Indoors: air conditioner grate for entering air                         | Slovenia: Ljubljana                    |           |
| <i>Aureobasidium pullulans</i>   | EXF-2618  | GCA_004918245.1    | Plant: grape surface                                                    | Slovenia: Ljubljana                    |           |
| <i>Aureobasidium pullulans</i>   | EXF-3645  | GCA_004918275.1    | Glacial: glacial ice at the edge of glacier                             | Norway: Ny-Ålesund                     |           |
| <i>Aureobasidium pullulans</i>   | EXF-3670  | GCA_004917815.1    | Glacial: glacial ice at the edge of glacier                             | Norway: Ny-Ålesund                     | 33        |
| <i>Aureobasidium pullulans</i>   | EXF-3750  | GCA_004918215.1    | Glacial: glacial ice at the edge of glacier                             | Norway: Ny-Ålesund                     |           |
| <i>Aureobasidium pullulans</i>   | EXF-3780  | GCA_004917755.1    | Hypersaline: microbial mat, bottom of the sea water<br>evaporation pond | Puerto Rico: Candelaria                |           |
| <i>Aureobasidium pullulans</i>   | EXF-150   | GCA_000721785.1    | Hypersaline waters of the Sečovlje solar saltern                        | Slovenia                               |           |
| <i>Aureobasidium namibiae</i>    | CBS147.97 | GCA_000721765.1    | Dolomitic marble in the Namib Desert                                    | Namibia                                |           |
| <i>Aureobasidium subglaciale</i> | EXF-2481  | GCA_000721755.1    | Subglacial ice of the Kongsvegen glacier on<br>Spitsbergen              | Svalbard, Norway                       | 35        |
| <i>Aureobasidium melanogenum</i> | CBS110374 | GCA_000721775.1    | Public fountain in Bangkok                                              | Thailand                               |           |
| <i>Aureobasidium melanogenum</i> | P16       | GCA_019915885.1    | Leaf of <i>Acanthus ilicifolius</i> in mangrove                         | Dongzhaigou, Hainan<br>Province, China |           |
