# Supplementary material for: Transcription Factors in Aureobasidium spp.: Classification, Regulation and a Newly Built Database
Source: J Fungi (Basel). 2022 Oct 17;8(10):1096. doi: 10.3390/jof8101096 (PMC9605165; doi:10.3390/jof8101096)
Supplement: Supplementary file 1 [file jof-08-01096-s001.zip]

Archive with 6 entries (6 files):
- Figure S1 and S2.pdf
- Table S1.pdf
- Table S2.xlsx
- Table S3.pdf
- Table S4.xlsx
- Table S5.pdf
