# Supplementary material for: Transcription Factors in Aureobasidium spp.: Classification, Regulation and a Newly Built Database
Source: J Fungi (Basel). 2022 Oct 17;8(10):1096. doi: 10.3390/jof8101096 (PMC9605165; doi:10.3390/jof8101096)
Supplement: Supplementary file 1 [file jof-08-01096-s001.zip › Table S2.xlsx]

## Sheet: Transcription factors
No.	Hyperlinks	Transcription factors	Activation/Repression (+/-)	Binding sites	Functions	Types	Regulation	Domain	Aureobasidium melanogenum CBS110374 (Reference)	Aureobasidium subglaciale EXF-2481 (Reference)	Aureobasidium pullulans EXF-150 (Reference)	Aureobasidium namibiae CBS 147.97 (Reference)	Hidden Markov Models (HMMs)	Hidden Markov Models Link
1	http://www.yeastract.com/view.php?existing=protein&proteinname=Msn2p	Msn2 (Zinc finger, C2H2 type)	+	CCCCT; AGGGG	Transcriptional activator related to Msn4p; activated in stress conditions, which results in translocation from the cytoplasm to the nucleus; binds DNA at stress response elements of responsive genes, inducing gene expression	Global	Regulation of nitrogen metabolism	zf-H2C2_2 (Zinc-finger double domain)	KEQ58292.1	XP_013341874.1	KEQ85121.1	XP_013429923.1	Msn2.hmm	https://huang.zgsj1.com/picture/literature/Msn22022021122005439328.zip
2	http://www.yeastract.com/view.php?existing=protein&proteinname=Gat1p	AreA (GATA zinc ﬁnger)	+	[A/T/C]GATA[A/G]	Transcriptional activator of genes regulated by nitrogen catabolite repression (NCR), localization and activity regulated by quality of nitrogen source	Global	Regulation of nitrogen metabolism	Zinc finger DNA binding domain	KEQ59671.1	XP_013344910.1	KEQ85528.1	XP_013427248.1	AreA.hmm	https://huang.zgsj1.com/picture/literature/AreA2022021321441535627.zip
	http://www.yeastract.com/view.php?existing=protein&proteinname=Gln3p						Regulation of nitrogen metabolism
3	http://www.yeastract.com/view.php?existing=protein&proteinname=Dal80p	AreB (GATA zinc ﬁnger)	-	[A/T/C]GATA[A/G]	Negative regulator of genes in multiple nitrogen degradation pathways; expression is regulated by nitrogen levels and by Gln3p; member of the GATA-binding family, forms homodimers and heterodimers with Deh1p	Global	Regulation of nitrogen metabolism	Zinc finger DNA binding domain	KEQ63290.1	XP_013346519.1	KEQ83634.1	XP_013425380.1	AreB.hmm	https://huang.zgsj1.com/picture/literature/AreB2022021321533863470.zip
4	https://www.uniprot.org/uniprot/B6Q5S4	MeaB (bZip)	+	TTGCACCAT	MeaB binds the promoter region of nmrA, and activates its expression in both nitrogen-sufficient and starved conditions.	Global	Regulation of nitrogen metabolism	bZIP domain	KEQ64761.1	XP_013344762.1	KEQ84618.1	XP_013429863.1	MeaB.hmm	https://huang.zgsj1.com/picture/literature/MeaB2022021321571777493.zip
5	https://www.uniprot.org/uniprot/A7WL55	TamA (Zn(II)2Cys6 type)	+	CCCGAACTTCGG	It mediates the regulation of the key nitrogen metabolism gene gdhA, which encodes NADP glutamate dehydrogenase.	Global	Regulation of nitrogen metabolism	GAL4-like Zn(II)2Cys6 (or C6 zinc) binuclear cluster DNA-binding domain	KEQ65152.1	XP_013347733.1	KEQ82269.1	XP_013431254.1	TamA.hmm	https://huang.zgsj1.com/picture/literature/TamA2022031723384329328.zip
6	http://www.yeastract.com/view.php?existing=locus&orfname=YKL015W	Put3 (Zn(II)2Cys6 type)	+	CGGN10CCG	Transcriptional activator of proline utilization genes, constitutively binds PUT1 and PUT2 promoter sequences and undergoes a conformational change to form the active state; has a Zn(2)-Cys(6) binuclear cluster domain	Specific	Regulation of nitrogen metabolism	Fungal Zn(2)-Cys(6) binuclear cluster domain	KEQ63835.1	XP_013344682.1	KEQ84675.1	XP_013429797.1	Put3.hmm	https://huang.zgsj1.com/picture/literature/Put32022031723320126202.zip
7	http://www.yeastract.com/view.php?existing=locus&orfname=YER145C	Ftr1 (Zinc finger, C2H2 type)	+	CGGN6CCG/CGGN11CCG	High affinity iron permease involved in the transport of iron across the plasma membrane; forms complex with Fet3p; expression is regulated by iron	Global	Regulation of multicellular metabolism	zf-H2C2_2 (Zinc-finger double domain)	KEQ60767.1	XP_013347669.1	KEQ78888.1	XP_013431386.1	Ftr1.hmm	https://huang.zgsj1.com/picture/literature/Ftr12022031723195841988.zip
8	http://www.yeastract.com/view.php?existing=protein&proteinname=Mig1p	Mig1/CreA (Zinc finger, C2H2 type)	-	AATTRTCCGGGG TATAGTGCGGGG	Transcription factor involved in glucose repression; sequence specific DNA binding protein containing two Cys2His2 zinc finger motifs; regulated by the Snf1 kinase and the Glc7 phosphatase	Global	Glucose repression	zf-H2C2_2 (Zinc-finger double domain)	KEQ62800.1	XP_013348881.1	KEQ88002.1	XP_013427384.1	Mig1.hmm	https://huang.zgsj1.com/picture/literature/Mig12022031723312565850.rar
9	http://www.yeastract.com/view.php?existing=protein&proteinname=Rim101p	PacC/Rim101 (Zinc finger, C2H2 type)	+	GCCARG	Transcriptional repressor involved in response to pH and in cell wall construction; required for alkaline pH-stimulated haploid invasive growth and sporulation; activated by proteolytic processing; similar to A. nidulans PacC	Specific	Regulation of acidic and alkaline genes by environmental pH	zf-H2C2_2（Zinc-finger double domain）	KEQ63386.1	XP_013339582.1	KEQ83946.1	XP_013424884.1	PacC/Rim101.hmm	https://huang.zgsj1.com/picture/literature/Rim1012022031723091625115.zip
10	https://www.uniprot.org/uniprot/E5DG73	AcuM (Zn(II)2Cys6 type)	-	CGG sequences	Iron carrier biosynthesis and inhibition of iron absorption by RIA	Specific	Synthesis of siderophore	GAL4-like Zn(II)2Cys6 (or C6 zinc) binuclear cluster DNA-binding domain	KEQ60508.1	XP_013341677.1	KEQ83702.1	XP_013423816.1	AcuM.hmm	https://huang.zgsj1.com/picture/literature/AcuM2022031723100787839.rar
11	https://www.uniprot.org/uniprot/B4XXY3	Sre1 (GATA zinc ﬁnger)	-	[A/T]GATA[A/G]	Inhibition of iron carrier biosynthesis		Synthesis of siderophore	Helix-loop-helix DNA-binding domain	KEQ62711.1	XP_013349270.1	KEQ87489.1	XP_013425817.1	Sre1.hmm	https://huang.zgsj1.com/picture/literature/Sre12022031723430545401.zip
12	https://www.uniprot.org/uniprot/G5EB20	SreA (GATA zinc ﬁnger)	-	(A/T/C)GATA(A/G)	Inhibition of iron carrier biosynthesis		Synthesis of siderophore	ZnF_GATA，Zinc finger DNA binding domain	KEQ65560.1	XP_013345184.1	KEQ85294.1	XP_013427137.1	SreA.hmm	https://huang.zgsj1.com/picture/literature/SreA2022031723431716587.zip
13	https://www.uniprot.org/uniprot/Q4WER3	HapX (bZip)	+	CCAAT	Inhibition of iron consumption, activation of iron absorption, activation of iron cell biosynthesis		Synthesis of siderophore	bZIP domain	KEQ61214.1	XP_013343503.1	KEQ86609.1	XP_013429027.1	HapX.hmm	https://huang.zgsj1.com/picture/literature/HapX2022031723212993222.zip
14	http://www.yeastract.com/view.php?existing=protein&proteinname=Hap2p	Hap2 (CCAAT-binding factor)	+	CCAAT	Subunit of the heme-activated, glucose-repressed Hap2p/3p/4p/5p CCAAT-binding complex, a transcriptional activator and global regulator of respiratory gene expression; contains sequences sufficient for both complex assembly and DNA binding	Global	Synthesis of siderophore	CCAAT-binding factor, subunit B	KEQ63801.1	XP_013344487.1	KEQ80544.1	XP_013429709.1	Hap2.hmm	https://huang.zgsj1.com/picture/literature/Hap22022031723211511492.zip
15	https://www.uniprot.org/uniprot/O42804	XlnR/GliZ (Zn2Cys6 fungal-type)	+	GGCTAAA	The specific regulator of xylan/cellulose degradation system, the activator of xylan degradation, regulates the degradation of cellulose and hemicellulose and the transport of enzyme protein through xylose induced glucosidase and glycoesterase.	Specific	Glycometabolism	GAL4-like Zn2Cys6 binuclear cluster DNA-binding domain	KEQ61042.1	XP_013344666.1	KEQ84466.1	XP_013427947.1	XlnR.hmm	https://huang.zgsj1.com/picture/literature/XlnR2022031723363518773.zip
16	http://www.yeastract.com/view.php?existing=protein&proteinname=Gal4p	Gal4 (Zn2Cys6 fungal-type)	+	CGGN{11}CCG	DNA-binding transcription factor required for the activation of the GAL genes in response to galactose; repressed by Gal80p and activated by Gal3p	Global	Galactose/melibiose metabolism	Leucine zipper domain (ZIP_Gal4)	KEQ66611.1	XP_013344019.1	KEQ89075.1	XP_013426659.1	Gal4.hmm	https://huang.zgsj1.com/picture/literature/Gal42022031723202617193.zip
17	https://www.uniprot.org/uniprot/O60201	AmyR (Zn(II)2Cys6 type)	+	CGGN8(A/C)GG	Combining with the promoter of starch hydrolase gene to regulate starch hydrolysis	Global	Starch hydrolysis	GAL4-like Zn(II)2Cys6 (or C6 zinc) binuclear cluster DNA-binding domain	KEQ62738.1	XP_013349059.1	KEQ87728.1	XP_013427505.1	AmyR.hmm	https://huang.zgsj1.com/picture/literature/AmyR2022031723105032431.zip
18	http://www.yeastract.com/view.php?existing=protein&proteinname=Ste12p	Ste12/BrlA (Zinc finger, C2H2 type)	+	TGAAACA MTGAAACA ATGAAACA GGAAACA TGTTTCAN{21}GGAAACG TGTTTCCN{18}TGTTTCT	Transcription factor that is activated by a MAP kinase signaling cascade, activates genes involved in mating or pseudohyphal/invasive growth pathways; cooperates with Tec1p transcription factor to regulate genes specific for invasive growth	Global	Pheromone Response Pathway (MAPK)	zf-H2C2_2 (Zinc-finger double domain)	KEQ57897.1	XP_013339162.1	KEQ79653.1	XP_013425134.1	Ste12.hmm	https://huang.zgsj1.com/picture/literature/Ste122022031723433345439.zip
19	http://www.yeastract.com/view.php?existing=protein&proteinname=Tec1p	Tec1 (DNA binding, TEA/ATTS)	+	CATTCT CATTCC CATTCTT	Transcription factor required for full Ty1 expression, Ty1-mediated gene activation, and haploid invasive and diploid pseudohyphal growth; TEA/ATTS DNA-binding domain family member	Global	Filamentation Pathway (MAPK)	TEA/ATTS domain family	KEQ60216.1	XP_013346974.1	KEQ87039.1	XP_013422661.1	Tec1.hmm	https://huang.zgsj1.com/picture/literature/Tec12022031723383035180.zip
20	http://www.yeastract.com/view.php?existing=protein&proteinname=Sko1p	Sko1 (bZip)	+	TGACGTTT TGACGTCA TTACGTAA ATGACGTA	Basic leucine zipper transcription factor of the ATF/CREB family; forms a complex with Tup1p and Cyc8p to both activate and repress transcription; cytosolic and nuclear protein involved in osmotic and oxidative stress responses	Global	Stress Response Pathway (HOG)	bZIP domain	KEQ62214.1	XP_013341246.1	KEQ85755.1	XP_013431140.1	Sko1.hmm	https://huang.zgsj1.com/picture/literature/Sko12022031723321876259.zip
21	http://www.yeastract.com/view.php?existing=protein&proteinname=Rlm1p	Smp1/Rlm1 (Mef2-type)	--?	ACTACTA(T/A)4TAG	Putative transcription factor involved in regulating the response to osmotic stress; member of the MADS-box family of transcription factors	Global	Stress Response Pathway (HOG)	conserved domain MADS_MEF2_like	KEQ65410.1	XP_013340146.1	KEQ86164.1	XP_013430702.1	Smp1.hmm	https://huang.zgsj1.com/picture/literature/Smp12022031723323097647.zip
22	http://www.yeastract.com/view.php?existing=protein&proteinname=Swi4p	Swi4/6 (HTH APSES-type)	+	CACGAAA TTTTCGCT tTTCGCGt	DNA binding component of the SBF complex (Swi4p-Swi6p), a transcriptional activator that in concert with MBF (Mbp1-Swi6p) regulates late G1-specific transcription of targets including cyclins and genes required for DNA synthesis and repair	Specific	CWI Pathway	KilA-N domain	KEQ58325.1	XP_013349208.1	KEQ87403.1	XP_013423121.1	Swi4.hmm	https://huang.zgsj1.com/picture/literature/Swi42022031723435927548.zip
23	http://www.yeastract.com/view.php?existing=protein&proteinname=Sok2p	StuA/Sok2 (HTH APSES-type)	±	(A/T)CGCG(T/A)N(A/C)	Nuclear protein that plays a regulatory role in the cyclic AMP (cAMP)-dependent protein kinase (PKA) signal transduction pathway; negatively regulates pseudohyphal differentiation; homologous to several transcription factors	Global	PKA Pathway	KilA-N domain	KEQ68036.1	XP_013347894.1	KEQ89838.1	XP_013426232.1	StuA.hmm	https://huang.zgsj1.com/picture/literature/StuA2022031723434832668.zip
24	https://www.uniprot.org/uniprot/Q6UEG8	AflR (Zn(II)2Cys6 type)	+	TCG(N5)GCA和TTAGGCCTAA	AFLR can also bind to the promoter region of its own gene, that is, it has the function of self activation	Specific	Regulation of secondary metabolites (SM)	GAL4-like Zn(II)2Cys6 (or C6 zinc) binuclear cluster DNA-binding domain	KEQ58933.1	XP_013348119.1	KEQ90018.1	XP_013425754.1	AflR.hmm	https://huang.zgsj1.com/picture/literature/AflR2022031723103339274.zip
25	https://www.uniprot.org/uniprot/Q92226	NsdD (GATA zinc ﬁnger)	-	[AT]GATA[AG]	NsdD seems to affect other biological processes, including cell death, autolysis and colony growth. The deletion of NSDD gene inhibited the death/autolysis of dflba mutant,and it was also related to the synthesis of secondary metabolites	Global	Regulation of secondary metabolites (SM)	ZnF_GATA	KEQ59738.1	XP_013349234.1	KEQ87777.1	XP_013423126.1	NsdD.hmm	https://huang.zgsj1.com/picture/literature/NsdD2022031723314898038.rar
26	http://www.yeastract.com/view.php?existing=locus&orfname=YDL156W	Cmr1/Pig1 (Zinc finger, C2H2 type; Zn2Cys6 fungal-type)	+	CGG sequences	Regulation of melanin synthesis	Specific	Regulation of secondary metabolites (SM)	zf-H2C2_2 (Zinc-finger double domain); Zn(2)-Cys(6) binuclear cluster domain	KEQ67497.1	XP_013341962.1	KEQ82753.1	XP_013431775.1	Cmr1.hmm	https://huang.zgsj1.com/picture/literature/Cmr12022031723123642965.zip
27	https://www.uniprot.org/uniprot/Q4WRY5	LaeA (methyltransferase superfamily)	+	Unknown	It regulates the expression of multiple secondary metabolic gene clusters and the production of secondary metabolites, and affects the morphological differentiation of filamentous fungi	Global	Regulation of secondary metabolites (SM)	Methyltransferase domain	KEQ57965.1	XP_013341898.1	KEQ84964.1	-	LaeA.hmm	https://huang.zgsj1.com/picture/literature/LaeA2022031723294039888.zip
28	http://www.yeastract.com/view.php?existing=protein&proteinname=Ino4p	Ino4 (BHLH)	-	ATGTGAAAT	Transcription factor required for derepression of inositol-choline-regulated genes involved in phospholipid synthesis; forms a complex, with Ino2p, that binds the inositol-choline-responsive element through a basic helix-loop-helix domain	Specific	Regulation of phospholipid synthesis	BHLH domain	KEQ67287.1	XP_013342223.1	KEQ79417.1	XP_013431994.1	Ino4.hmm	https://huang.zgsj1.com/picture/literature/Ino42022031723223063246.zip
29	http://www.yeastract.com/view.php?existing=protein&proteinname=Cbf1p	Cbf1 (BHLH)	±	RTCACGTG	Dual function helix-loop-helix protein; binds the motif CACRTG present at several sites including MET gene promoters and centromere DNA element I (CDEI); affects nucleosome positioning at this motif; associates with other transcription factors such as Met4p and Isw1p to mediate transcriptional activation or repression; associates with kinetochore proteins and required for efficient chromosome seg…	Global	Chromatin remodeling and stress resistance	BHLH domain	KEQ65045.1	XP_013347377.1	KEQ79492.1	XP_013422786.1	Cbf1.hmm	https://huang.zgsj1.com/picture/literature/Cbf12022031723122440260.zip
30	https://www.uniprot.org/uniprot/P17871	TFIID (TATA binding protein)	+	TATA box	TBP protein binds to TATA box and bends DNA with 14 TAFs. TBP is a component of location factor. Every kind of RNA polymerase binding to promoter needs TBP. TBPs are transcription factors that recognize promoter and start transcription. TBP directly binds to TATA box promoter element. In TATA box promoter element, it makes polymerase assemble into nucleus, so as to determine transcription initiat…	General	RNA polymerase II transcription	conserved domain TBP_eukaryotes	KEQ65997.1	XP_013341273.1	KEQ89010.1	XP_013424226.1	TFIID.hmm	https://huang.zgsj1.com/picture/literature/TFIID2022031723373069778.zip
31	https://www.uniprot.org/uniprot/P48512	TFIIB (TATA binding protein)	+	TATA box	It directly binds to RNA polymerase II and is responsible for its correct localization in the promoter. It is recruited to transcribe pic transcription initiation complex after binding TBP and TATA box, forming tbp-dna-tfiib-polii complex, attracting RNA polymerase and tfiif to the promoter region	General		TFIIB-domain	KEQ64262.1	XP_013345888.1	KEQ79242.1	XP_013429989.1	TFIIB.hmm	https://huang.zgsj1.com/picture/literature/TFIIB2022031723380981862.zip
32	https://www.uniprot.org/uniprot/P36145	TFIIE (TFIIE superfamily)	+	the C-terminal domain binds to TFIIH	Interacting with nonphosphorylated RNA polymerase II and TFIIH, tfiie recruits TFIIH to complete pic formation and regulate enzyme activity of TFIIH, stimulate helicase and CTD kinase activity of TFIIH. Tfiie and TFIIH have significant functions in transcription initiation and transition to elongation	General		helix-turn-helix domains	KEQ58260.1	XP_013340782.1	KEQ84839.1	XP_013430133.1	TFIIE.hmm	https://huang.zgsj1.com/picture/literature/TFIIE2022031723375291276.zip
33	https://www.uniprot.org/uniprot/P41895	TFIIF (TFIIF-alpha family)	+	Unknown	To prevent the non-specific binding between RNA polymerase II and DNA and stabilize PIC	General		conserved domain TFIIFa、Rap30/74 interaction domain	KEQ64374.1	XP_013345832.1	KEQ88557.1	XP_013424660.1	TFIIF.hmm	https://huang.zgsj1.com/picture/literature/TFIIF2022031723370892299.zip
34	https://www.uniprot.org/uniprot/P32776	TFIIH (CCL1 & CYCLIN_SF super family)	+	The protein domain of p62 subunit binds to the AC‐D domain of TFIIEα	TFIIH can regulate the transition from transcription initiation to elongation, which is supposed to be mediated by the phosphorylation of CTD (C-terminal domain). The DNA helicase activity of TFIIH uses ATP to untie more DNA double strands at the initiation site. TFIIH phosphorylates RNA polymerase iictd, which makes RNA polymerase II leave the promoter and enter the elongation stage. TFIIH is al…	General		conserved domain Cyclin	KEQ66614.1	XP_013345222.1	KEQ89389.1	XP_013426707.1	TFIIH.hmm	https://huang.zgsj1.com/picture/literature/TFIIH2022031723365134192.zip
35	https://www.uniprot.org/uniprot/P32774	TFIIA (TFIIA superfamily)	+	TATA box	It can promote the binding activity of TFIID to TATA box, and make TBP and TFIIB bind to promoter stably	General		conserved domain TFIIA_alpha_beta_like	KEQ67241.1	XP_013342277.1	KEQ79365.1	XP_013432061.1	TFIIA.hmm	https://huang.zgsj1.com/picture/literature/TFIIA2022031723381989544.zip
36	http://www.yeastract.com/view.php?existing=protein&proteinname=Crz1p	Crz1p/Tcn1p/Hal8 (Zinc finger, C2H2 type)	+	GNGGC(G/T)CA	Transcription factor that activates transcription of genes involved in stress response; nuclear localization is positively regulated by calcineurin-mediated dephosphorylation	Global	Calcium signaling pathway	zf-H2C2_2 (Zinc-finger double domain)	KEQ62890.1	XP_013348807.1	KEQ87890.1	XP_013427718.1	Crz1.hmm	https://huang.zgsj1.com/picture/literature/Crz12022031723193777981.zip
37	http://www.yeastract.com/view.php?existing=protein&proteinname=Mac1p	Mac1 (Copper fist)	+	TTTGC(T/G)C(A/G)	Copper-sensing transcription factor involved in regulation of genes required for high affinity copper transport	Specific	Regulation of copper transport	Copper fist DNA binding domain	KEQ60235.1	XP_013346967.1	KEQ87077.1	XP_013428569.1	Mac1.hmm	https://huang.zgsj1.com/picture/literature/Mac12022031723301241078.zip
38	https://www.ebi.ac.uk/interpro/entry/InterPro/IPR001878/	Ga11 (Zinc knuckle)	+	Unknown	Regulating heavy oil synthesis	Specific	Heavy oils (liamocins)	Zinc knuckle	KEQ58072.1	XP_013339825.1	KEQ83091.1	XP_013426153.1	Ga11.hmm	https://huang.zgsj1.com/picture/literature/Ga112022031723201461958.zip
39	http://www.yeastract.com/view.php?existing=locus&orfname=YMR280C	Cat8 (Zn(II)2Cys6 type)	+	TCCATTSRTCCGR NCCDTYNVNCCGN YCCNYTNRRCCGN	Zinc cluster transcriptional activator necessary for derepression of a variety of genes under non-fermentative growth conditions, active after diauxic shift, binds carbon source responsive elements	Global	Gluconeogenesis	GAL4-like Zn(II)2Cys6 (or C6 zinc) binuclear cluster DNA-binding domain	KEQ62702.1	XP_013349222.1	KEQ87544.1	XP_013425772.1	Cat8.hmm	https://huang.zgsj1.com/picture/literature/Cat82022031723112639620.zip
40	http://www.yeastract.com/view.php?existing=protein&proteinname=Yap1p	Yap1 (bZip)	+	TTACTAA TGACTCA TGACTAA TKACAAA TTACTCA	Basic leucine zipper (bZIP) transcription factor required for oxidative stress tolerance; activated by H2O2 through the multistep formation of disulfide bonds and transit from the cytoplasm to the nucleus; mediates resistance to cadmium	Global	Oxidative stress	bZIP	KEQ58848.1	XP_013348205.1	KEQ81936.1	XP_013427686.1	Yap1.hmm	https://huang.zgsj1.com/picture/literature/Yap12022031723362528881.zip
41	http://www.yeastract.com/view.php?existing=protein&proteinname=Hsf1p	Hsf1 (HSF-type DNA-binding)	+	nGAAn	Trimeric heat shock transcription factor, activates multiple genes in response to stresses that include hyperthermia; recognizes variable heat shock elements (HSEs) consisting of inverted NGAAN repeats; posttranslationally regulated	Global	Thermotolerance	-	KEQ66690.1	XP_013345583.1	KEQ89474.1	XP_013426757.1	Hsf1.hmm	https://huang.zgsj1.com/picture/literature/Hsf12022031723214789338.zip
42	http://www.yeastract.com/view.php?existing=protein&proteinname=Mcm1p	Mcm1 (MADS-box)	+	TTACCNAATTNGGTAA TTWCCYAAWNNGGWAAWW DCCYWWWNNRG CCYWWWNNRG CCTAATTAGG	Transcription factor involved in cell-type-specific transcription and pheromone response; plays a central role in the formation of both repressor and activator complexes	Global	Cell cycle	MADS domain	KEQ59690.1	XP_013344986.1	KEQ85508.1	XP_013427243.1	Mcm1.hmm	https://huang.zgsj1.com/picture/literature/Mcm12022031723304078984.zip
43	https://www.uniprot.org/uniprot/P0CY06	Matα (MAT alpha 1 HMG-box)	+	Unknown	MATα1 is a transcription activator which activates mating-type alpha-specific genes. MATα1 and Mcm 1 bind cooperatively to PQ elements upstream of alpha-specific genes. MATα1 interacts in vivo with Ste12, linking expression of alpha-specific genes to the alpha-pheromone (PF04648) response pathway.	Specific	Cell cycle	MAT_alpha1 domain	KL584825.1: 923262-924538	NW_013566989.1: 363613-364902	KEQ90140.1	NW_013581199.1: 224581-223303	Matα.hmm	https://huang.zgsj1.com/picture/literature/Matα2022031723302534038.zip
44	http://www.yeastract.com/view.php?existing=protein&proteinname=Gis1p	Gis1 (Zinc finger, C2H2 type)	±	AGGGG	Gis1 (Q03833.1) contains the jmjc domain of histone demethylase and transcription factor, and participates in gene expression during nutritional restriction, negatively regulating Dpp1 and Phr1. Deletion of Gis1 derepresses basal-level expression from an STRE-driven reporter gene. There is cross talk between the multistress response and the Gis1 DNA damage response pathway or that deletion of Gis…	Global	DNA damage response pathway or stress response pathway	JmjN and JmjC domain	KEQ65041.1	XP_013347624.1	KEQ79497.1	XP_013422829.1	Gis1.hmm	https://huang.zgsj1.com/picture/literature/Gis12022031723210024816.zip
45	http://www.yeastract.com/view.php?existing=protein&proteinname=Gcr1p	Gcr1 (GCR1_C superfamily)	+	CT-box (CTTCC, CWTCC)	Transcriptional activators of glycolysis related genes. It is a DNA binding protein that interacts and functions with transcriptional activator Gcr2p. Gcr2p plays a role in glycolysis gene expression, and the deletion or mutation of Gcr2p will reduce the expression level of most glycolytic enzymes.	Global	Glycolysis	GAL4-like Zn(II)2Cys6 (or C6 zinc) binuclear cluster DNA-binding domain; CTTCC sequence motifs	KEQ58115.1	XP_013342669.1	KEQ83147.1	XP_013426196.1	Gcr1.hmm	https://huang.zgsj1.com/picture/literature/Gcr12022031723204130822.zip
