# Supplementary material for: Transcription Factors in Aureobasidium spp.: Classification, Regulation and a Newly Built Database
Source: J Fungi (Basel). 2022 Oct 17;8(10):1096. doi: 10.3390/jof8101096 (PMC9605165; doi:10.3390/jof8101096)
Supplement: Supplementary file 1 [file jof-08-01096-s001.zip › Table S4.xlsx]

## Sheet: AcuM
KEGG Orthology (KO)	Reference	subject acc.ver	% identity	alignment length	mismatches	gap opens	q. start	q. end	s. start	s. end	evalue	bit score
no KO assigned	KEQ60508.1	KAH0347107.1	93.555	481	0	1	1	450	43	523	0	933
no KO assigned	KEQ60508.1	KAH0327180.1	92.946	482	2	2	1	450	43	524	0	925
no KO assigned	KEQ60508.1	KAH0258289.1	92.946	482	2	2	1	450	43	524	0	925
no KO assigned	KEQ60508.1	KAG9789656.1	92.946	482	2	2	1	450	43	524	0	925
no KO assigned	KEQ60508.1	KAG9692842.1	92.946	482	2	2	1	450	43	524	0	925
no KO assigned	KEQ60508.1	KAG9943701.1	98.826	426	4	1	1	426	42	466	0	882
no KO assigned	KEQ60508.1	KAH0230786.1	87.866	478	26	4	1	450	43	516	0	842
no KO assigned	KEQ60508.1	KAH0353292.1	88.382	482	24	3	1	450	44	525	0	842
no KO assigned	KEQ60508.1	KAH0328559.1	88.382	482	24	3	1	450	44	525	0	842
no KO assigned	KEQ60508.1	KAH0366199.1	88.174	482	25	3	1	450	44	525	0	839
no KO assigned	KEQ60508.1	KAH0167735.1	88.174	482	25	3	1	450	44	525	0	839
no KO assigned	KEQ60508.1	KAH0089163.1	88.174	482	25	3	1	450	44	525	0	839
no KO assigned	KEQ60508.1	KAH0112559.1	88.174	482	25	3	1	450	44	525	0	839
no KO assigned	KEQ60508.1	KAH0054994.1	88.174	482	25	3	1	450	44	525	0	839
no KO assigned	KEQ60508.1	KAH0040317.1	88.174	482	25	3	1	450	44	525	0	839
no KO assigned	KEQ60508.1	KAG9940212.1	88.174	482	25	3	1	450	44	525	0	839
no KO assigned	KEQ60508.1	KAG9741637.1	88.174	482	25	3	1	450	44	525	0	839
no KO assigned	KEQ60508.1	KAG9778526.1	88.174	482	25	3	1	450	44	525	0	839
no KO assigned	KEQ60508.1	KAG9636837.1	88.174	482	25	3	1	450	44	525	0	839
no KO assigned	KEQ60508.1	KAG9703894.1	88.174	482	25	3	1	450	44	525	0	839
no KO assigned	KEQ60508.1	KAG9604092.1	88.174	482	25	3	1	450	44	525	0	839
no KO assigned	KEQ60508.1	KAG9595805.1	88.174	482	25	3	1	450	44	525	0	839
no KO assigned	KEQ60508.1	KAH0323839.1	86.042	480	32	3	1	449	43	518	0	838
no KO assigned	KEQ60508.1	KAG9786888.1	86.042	480	32	3	1	449	43	518	0	838
no KO assigned	KEQ60508.1	KAG9848957.1	88.174	482	25	3	1	450	1	482	0	835
no KO assigned	KEQ60508.1	KAH0380332.1	86.82	478	31	4	1	450	30	503	0	830
no KO assigned	KEQ60508.1	KAH0029262.1	87.866	478	26	4	1	450	43	516	0	830
no KO assigned	KEQ60508.1	KAG9530776.1	87.866	478	26	4	1	450	30	503	0	829
no KO assigned	KEQ60508.1	KAH0221085.1	86.526	475	31	5	1	447	43	512	0	825
no KO assigned	KEQ60508.1	KAH0244534.1	86.526	475	31	5	1	447	43	512	0	825
no KO assigned	KEQ60508.1	KAH0187874.1	86.526	475	31	5	1	447	43	512	0	825
no KO assigned	KEQ60508.1	KAH0198980.1	86.526	475	31	5	1	447	43	512	0	825
no KO assigned	KEQ60508.1	KAG9671957.1	86.526	475	31	5	1	447	43	512	0	825
no KO assigned	KEQ60508.1	KAG9567113.1	87.924	472	25	3	1	440	44	515	0	819
no KO assigned	KEQ60508.1	KAG9964218.1	87.924	472	25	3	1	440	44	515	0	818
no KO assigned	KEQ60508.1	KAH0212843.1	87.712	472	26	3	1	440	44	515	0	817
no KO assigned	KEQ60508.1	KAH0125014.1	87.712	472	26	3	1	440	44	515	0	817
no KO assigned	KEQ60508.1	KAG9857263.1	87.712	472	26	3	1	440	44	515	0	817
no KO assigned	KEQ60508.1	KAH0259853.1	87.712	472	26	3	1	440	30	501	0	814
no KO assigned	KEQ60508.1	KAH0289533.1	86.492	459	47	5	2	450	40	493	0	811
no KO assigned	KEQ60508.1	KEQ69684.1	86.492	459	47	5	2	450	40	493	0	811
no KO assigned	KEQ60508.1	KAG9691133.1	94.444	414	15	2	1	410	43	452	0	809
no KO assigned	KEQ60508.1	KAG9661181.1	94.444	414	15	2	1	410	44	453	0	808
no KO assigned	KEQ60508.1	KAH0033775.1	87.179	468	32	2	1	440	30	497	0	807
no KO assigned	KEQ60508.1	KAH0419658.1	87.179	468	32	2	1	440	44	511	0	806
no KO assigned	KEQ60508.1	KAH0170983.1	87.179	468	32	2	1	440	30	497	0	806
no KO assigned	KEQ60508.1	KAH0213266.1	87.179	468	32	2	1	440	30	497	0	806
no KO assigned	KEQ60508.1	KAH0129379.1	87.179	468	32	2	1	440	30	497	0	806
no KO assigned	KEQ60508.1	KAH0093801.1	87.179	468	32	2	1	440	30	497	0	806
no KO assigned	KEQ60508.1	KAH0114796.1	87.179	468	32	2	1	440	30	497	0	806
no KO assigned	KEQ60508.1	KAH0055315.1	87.179	468	32	2	1	440	30	497	0	806
no KO assigned	KEQ60508.1	KAH0034297.1	87.179	468	32	2	1	440	30	497	0	806
no KO assigned	KEQ60508.1	KAG9990127.1	87.179	468	32	2	1	440	30	497	0	806
no KO assigned	KEQ60508.1	KAG9911118.1	87.179	468	32	2	1	440	30	497	0	806
no KO assigned	KEQ60508.1	KAG9936472.1	87.179	468	32	2	1	440	30	497	0	806
no KO assigned	KEQ60508.1	KAG9928072.1	87.179	468	32	2	1	440	30	497	0	806
no KO assigned	KEQ60508.1	KAG9858666.1	87.179	468	32	2	1	440	30	497	0	806
no KO assigned	KEQ60508.1	KAG9858661.1	87.179	468	32	2	1	440	44	511	0	806
no KO assigned	KEQ60508.1	KAG9856544.1	87.179	468	32	2	1	440	30	497	0	806
no KO assigned	KEQ60508.1	KAG9742327.1	87.179	468	32	2	1	440	30	497	0	806
no KO assigned	KEQ60508.1	KAG9772280.1	87.179	468	32	2	1	440	30	497	0	806
no KO assigned	KEQ60508.1	KAG9632925.1	87.179	468	32	2	1	440	30	497	0	806
no KO assigned	KEQ60508.1	KAG9702455.1	87.179	468	32	2	1	440	30	497	0	806
no KO assigned	KEQ60508.1	KAG9599494.1	87.179	468	32	2	1	440	30	497	0	806
no KO assigned	KEQ60508.1	KAG9592713.1	87.179	468	32	2	1	440	30	497	0	806
no KO assigned	KEQ60508.1	KAG9521952.1	87.179	468	28	4	1	440	43	506	0	804
no KO assigned	KEQ60508.1	KAG9987516.1	94.444	414	15	2	1	410	43	452	0	803
no KO assigned	KEQ60508.1	KAG9909258.1	94.444	414	15	2	1	410	43	452	0	803
no KO assigned	KEQ60508.1	KAG9933800.1	94.444	414	15	2	1	410	43	452	0	803
no KO assigned	KEQ60508.1	KAG9852942.1	94.444	414	15	2	1	410	43	452	0	803
no KO assigned	KEQ60508.1	CAD0111425.1	82.292	480	53	4	1	448	49	528	0	800
no KO assigned	KEQ60508.1	CAD0084552.1	82.34	470	53	5	1	440	78	547	0	785
no KO assigned	KEQ60508.1	KAH0417105.1	87.692	455	24	3	28	450	1	455	0	781
no KO assigned	KEQ60508.1	KAH0162867.1	86.031	451	31	4	28	450	1	447	0	770
no KO assigned	KEQ60508.1	KEQ93071.1	79.412	476	60	6	1	440	48	521	0	758
no KO assigned	KEQ60508.1	KAH0365364.1	95.573	384	14	3	1	382	30	412	0	737
no KO assigned	KEQ60508.1	THW27724.1	77.684	475	75	8	1	450	44	512	0	722
no KO assigned	KEQ60508.1	KEQ83702.1	77.637	474	76	8	1	450	44	511	0	721
no KO assigned	KEQ60508.1	THY11604.1	77.474	475	76	8	1	450	44	512	0	720
no KO assigned	KEQ60508.1	THW34832.1	77.474	475	76	8	1	450	44	512	0	718
no KO assigned	KEQ60508.1	TIA06055.1	77.474	475	76	8	1	450	44	512	0	718
no KO assigned	KEQ60508.1	THW84730.1	77.684	475	75	8	1	450	44	512	0	717
no KO assigned	KEQ60508.1	THX23332.1	77.263	475	77	8	1	450	44	512	0	717
no KO assigned	KEQ60508.1	THY15441.1	77.215	474	78	8	1	450	44	511	0	716
no KO assigned	KEQ60508.1	THX23518.1	77.149	477	74	9	1	450	44	512	0	716
no KO assigned	KEQ60508.1	THX11009.1	77.101	476	77	8	1	450	44	513	0	716
no KO assigned	KEQ60508.1	CAD0018196.1	76.632	475	79	9	1	450	46	513	0	704
no KO assigned	KEQ60508.1	CAD0026775.1	76.421	475	80	9	1	450	46	513	0	702
no KO assigned	KEQ60508.1	THX94370.1	76.989	465	76	8	1	440	44	502	0	701
no KO assigned	KEQ60508.1	THX50613.1	76.559	465	78	8	1	440	44	502	0	700
no KO assigned	KEQ60508.1	THW58417.1	76.989	465	76	8	1	440	44	502	0	700
no KO assigned	KEQ60508.1	THZ90509.1	76.989	465	76	8	1	440	74	532	0	699
no KO assigned	KEQ60508.1	THY58836.1	76.989	465	76	8	1	440	44	502	0	699
no KO assigned	KEQ60508.1	THW62283.1	76.989	465	76	8	1	440	44	502	0	699
no KO assigned	KEQ60508.1	TIA05786.1	77.106	463	77	8	1	440	44	500	0	699
no KO assigned	KEQ60508.1	TIA70685.1	76.774	465	77	8	1	440	44	502	0	697
no KO assigned	KEQ60508.1	THZ55029.1	76.774	465	77	8	1	440	44	502	0	697
no KO assigned	KEQ60508.1	THZ45770.1	76.774	465	77	8	1	440	44	502	0	697
no KO assigned	KEQ60508.1	THZ12622.1	76.989	465	76	8	1	440	44	502	0	697
no KO assigned	KEQ60508.1	THY71865.1	76.774	465	77	8	1	440	44	502	0	697
no KO assigned	KEQ60508.1	THX91550.1	76.989	465	76	8	1	440	44	502	0	697
no KO assigned	KEQ60508.1	THV64939.1	76.989	465	76	8	1	440	44	502	0	697
no KO assigned	KEQ60508.1	THW27833.1	76.989	465	76	8	1	440	44	502	0	697
no KO assigned	KEQ60508.1	TIA29588.1	76.559	465	78	8	1	440	44	502	0	695
no KO assigned	KEQ60508.1	TIA64857.1	76.559	465	78	8	1	440	44	502	0	695
no KO assigned	KEQ60508.1	TIA50809.1	76.774	465	77	8	1	440	44	502	0	694
no KO assigned	KEQ60508.1	CAD0053779.1	76.66	467	74	9	1	440	44	502	0	692
no KO assigned	KEQ60508.1	THX66988.1	76.559	465	78	8	1	440	43	501	0	692
no KO assigned	KEQ60508.1	KAH0327966.1	91.935	372	22	2	1	368	30	397	0	692
no KO assigned	KEQ60508.1	KAG9569556.1	91.935	372	22	2	1	368	30	397	0	692
no KO assigned	KEQ60508.1	THY37573.1	75.212	472	79	8	1	440	44	509	0	689
no KO assigned	KEQ60508.1	KAH0399986.1	91.389	360	23	2	1	356	30	385	0	686
no KO assigned	KEQ60508.1	KAG9750962.1	91.389	360	23	2	1	356	30	385	0	686
no KO assigned	KEQ60508.1	THZ57832.1	71.4	500	77	9	1	440	44	537	0	682
no KO assigned	KEQ60508.1	THX72442.1	71.4	500	77	9	1	440	44	537	0	682
no KO assigned	KEQ60508.1	THW07855.1	71.4	500	77	9	1	440	44	537	0	682
no KO assigned	KEQ60508.1	CAC9889442.1	71.912	502	73	10	1	440	44	539	0	681
no KO assigned	KEQ60508.1	THW33961.1	71.514	502	75	9	1	440	44	539	0	680
no KO assigned	KEQ60508.1	THY84024.1	71.2	500	78	9	1	440	44	537	0	680
no KO assigned	KEQ60508.1	THY39604.1	71.315	502	76	9	1	440	44	539	0	680
no KO assigned	KEQ60508.1	THZ82726.1	71.116	502	77	9	1	440	44	539	0	679
no KO assigned	KEQ60508.1	TIA28980.1	70.891	505	74	10	1	440	44	540	0	675
no KO assigned	KEQ60508.1	KAG2166570.1	70.916	502	78	9	1	440	44	539	0	675
no KO assigned	KEQ60508.1	THX58766.1	77.778	441	73	7	1	416	44	484	0	674
no KO assigned	KEQ60508.1	CAD0050244.1	70.518	502	80	9	1	440	44	539	0	672
no KO assigned	KEQ60508.1	THY80578.1	78.621	435	68	7	1	410	44	478	0	671
no KO assigned	KEQ60508.1	THZ68469.1	78.391	435	69	7	1	410	44	478	0	669
no KO assigned	KEQ60508.1	THZ09235.1	71.757	478	73	8	1	416	44	521	0	654
no KO assigned	KEQ60508.1	THV92557.1	77.053	414	69	7	1	388	44	457	0	621
no KO assigned	KEQ60508.1	KAG9635243.1	85.912	362	18	3	122	450	1	362	0	612
no KO assigned	KEQ60508.1	CAD0092414.1	88.116	345	25	3	28	368	1	333	0	600
no KO assigned	KEQ60508.1	THW72288.1	76.336	393	68	7	1	368	44	436	0	585
no KO assigned	KEQ60508.1	THY85166.1	76.276	392	69	7	1	368	44	435	0	585
no KO assigned	KEQ60508.1	THW80639.1	76.59	393	67	7	1	368	44	436	0	583
no KO assigned	KEQ60508.1	THV84829.1	76.59	393	67	7	1	368	44	436	0	583
no KO assigned	KEQ60508.1	THX35176.1	75.126	398	74	7	1	373	44	441	0	582
no KO assigned	KEQ60508.1	THV69658.1	76.081	393	69	7	1	368	44	436	0	581
no KO assigned	KEQ60508.1	THZ28509.1	76.104	385	67	7	1	360	44	428	0	570

## Sheet: AflR
KEGG Orthology (KO)	Reference	subject acc.ver	% identity	alignment length	mismatches	gap opens	q. start	q. end	s. start	s. end	evalue	bit score
no KO assigned	KEQ58933.1	KAH0338602.1	100	761	0	0	1	761	5	765	0	1579
no KO assigned	KEQ58933.1	KAG9949583.1	99.606	761	3	0	1	761	5	765	0	1573
no KO assigned	KEQ58933.1	KAH0310881.1	99.343	761	5	0	1	761	1	761	0	1566
no KO assigned	KEQ58933.1	KAG9774887.1	99.343	761	5	0	1	761	1	761	0	1566
no KO assigned	KEQ58933.1	KAG9682709.1	99.343	761	5	0	1	761	1	761	0	1566
no KO assigned	KEQ58933.1	KAH0366911.1	99.212	761	6	0	1	761	5	765	0	1565
no KO assigned	KEQ58933.1	KAH0275662.1	98.817	761	9	0	1	761	5	765	0	1562
no KO assigned	KEQ58933.1	KAG9847740.1	98.686	761	10	0	1	761	16	776	0	1557
no KO assigned	KEQ58933.1	KAG9521351.1	98.555	761	11	0	1	761	5	765	0	1556
no KO assigned	KEQ58933.1	KAG9774834.1	98.686	761	10	0	1	761	1	761	0	1555
no KO assigned	KEQ58933.1	KAG9682678.1	98.686	761	10	0	1	761	1	761	0	1555
no KO assigned	KEQ58933.1	KAH0345374.1	98.423	761	12	0	1	761	5	765	0	1554
no KO assigned	KEQ58933.1	KAH0234044.1	98.423	761	12	0	1	761	5	765	0	1554
no KO assigned	KEQ58933.1	KAH0216148.1	98.423	761	12	0	1	761	5	765	0	1554
no KO assigned	KEQ58933.1	KAH0242300.1	98.423	761	12	0	1	761	5	765	0	1554
no KO assigned	KEQ58933.1	KAH0185778.1	98.423	761	12	0	1	761	5	765	0	1554
no KO assigned	KEQ58933.1	KAH0204450.1	98.423	761	12	0	1	761	5	765	0	1554
no KO assigned	KEQ58933.1	KAG9837954.1	98.423	761	12	0	1	761	5	765	0	1554
no KO assigned	KEQ58933.1	KAG9740900.1	98.423	761	12	0	1	761	5	765	0	1554
no KO assigned	KEQ58933.1	KAG9669060.1	98.423	761	12	0	1	761	5	765	0	1554
no KO assigned	KEQ58933.1	KAG9529739.1	98.423	761	12	0	1	761	5	765	0	1554
no KO assigned	KEQ58933.1	KAH0156197.1	98.423	761	12	0	1	761	16	776	0	1553
no KO assigned	KEQ58933.1	KAH0400106.1	98.292	761	13	0	1	761	5	765	0	1553
no KO assigned	KEQ58933.1	KAH0387587.1	98.292	761	13	0	1	761	5	765	0	1552
no KO assigned	KEQ58933.1	KAH0170003.1	98.292	761	13	0	1	761	5	765	0	1552
no KO assigned	KEQ58933.1	KAH0119551.1	98.292	761	13	0	1	761	5	765	0	1552
no KO assigned	KEQ58933.1	KAG9631972.1	98.292	761	13	0	1	761	5	765	0	1552
no KO assigned	KEQ58933.1	KAG9677925.1	98.292	761	13	0	1	761	16	776	0	1551
no KO assigned	KEQ58933.1	KAG9958311.1	98.029	761	13	1	1	761	5	763	0	1544
no KO assigned	KEQ58933.1	KAG9637167.1	97.898	761	14	1	1	761	6	764	0	1540
no KO assigned	KEQ58933.1	KAH0268152.1	98.518	742	11	0	1	742	5	746	0	1518
no KO assigned	KEQ58933.1	KAG9541118.1	98.518	742	11	0	1	742	5	746	0	1518
no KO assigned	KEQ58933.1	KAG9828226.1	98.647	739	10	0	1	739	16	754	0	1511
no KO assigned	KEQ58933.1	KAG9728014.1	98.647	739	10	0	1	739	16	754	0	1511
no KO assigned	KEQ58933.1	KAH0426947.1	98.512	739	11	0	1	739	5	743	0	1509
no KO assigned	KEQ58933.1	KAH0076163.1	98.512	739	11	0	1	739	16	754	0	1509
no KO assigned	KEQ58933.1	KAH0024673.1	98.512	739	11	0	1	739	16	754	0	1509
no KO assigned	KEQ58933.1	KAG9911443.1	98.512	739	11	0	1	739	16	754	0	1509
no KO assigned	KEQ58933.1	KAG9746398.1	98.512	739	11	0	1	739	16	754	0	1509
no KO assigned	KEQ58933.1	KAG9575976.1	98.512	739	11	0	1	739	16	754	0	1509
no KO assigned	KEQ58933.1	KAH0179220.1	98.507	737	11	0	1	737	16	752	0	1506
no KO assigned	KEQ58933.1	CAD0107729.1	94.737	760	25	3	1	760	5	749	0	1473
no KO assigned	KEQ58933.1	KAH0286633.1	95.039	766	33	2	1	761	5	770	0	1388
no KO assigned	KEQ58933.1	KEQ99447.1	93.307	762	48	2	1	761	5	764	0	1368
no KO assigned	KEQ58933.1	KEQ90018.1	93.307	762	48	2	1	761	5	764	0	1361
no KO assigned	KEQ58933.1	THW84301.1	93.045	762	50	2	1	761	5	764	0	1360
no KO assigned	KEQ58933.1	CAC9884865.1	88.625	800	50	4	1	761	5	802	0	1337
no KO assigned	KEQ58933.1	CAD0043029.1	90.682	762	57	4	1	761	10	758	0	1320
no KO assigned	KEQ58933.1	CAD0095108.1	90.26	770	48	6	1	761	1	752	0	1295
no KO assigned	KEQ58933.1	KEQ71633.1	96.562	669	22	1	93	760	30	698	0	1274
no KO assigned	KEQ58933.1	THZ57249.1	95.334	643	29	1	120	761	137	779	0	1256
no KO assigned	KEQ58933.1	THZ75541.1	95.334	643	29	1	120	761	137	779	0	1256
no KO assigned	KEQ58933.1	THY93520.1	95.334	643	29	1	120	761	137	779	0	1256
no KO assigned	KEQ58933.1	THW61703.1	95.334	643	29	1	120	761	137	779	0	1256
no KO assigned	KEQ58933.1	THW61551.1	95.334	643	29	1	120	761	137	779	0	1256
no KO assigned	KEQ58933.1	THW12679.1	95.334	643	29	1	120	761	137	779	0	1256
no KO assigned	KEQ58933.1	THY07786.1	95.334	643	29	1	120	761	122	764	0	1255
no KO assigned	KEQ58933.1	KAG2161171.1	95.334	643	29	1	120	761	122	764	0	1255
no KO assigned	KEQ58933.1	TIA43412.1	95.334	643	29	1	120	761	122	764	0	1255
no KO assigned	KEQ58933.1	TIA50565.1	95.334	643	29	1	120	761	122	764	0	1255
no KO assigned	KEQ58933.1	TIA67624.1	95.334	643	29	1	120	761	122	764	0	1255
no KO assigned	KEQ58933.1	TIA20078.1	95.334	643	29	1	120	761	122	764	0	1255
no KO assigned	KEQ58933.1	THZ75371.1	95.334	643	29	1	120	761	122	764	0	1255
no KO assigned	KEQ58933.1	TIA49644.1	95.334	643	29	1	120	761	122	764	0	1255
no KO assigned	KEQ58933.1	TIA20468.1	95.334	643	29	1	120	761	122	764	0	1255
no KO assigned	KEQ58933.1	THZ99596.1	95.334	643	29	1	120	761	122	764	0	1255
no KO assigned	KEQ58933.1	THZ64048.1	95.334	643	29	1	120	761	122	764	0	1255
no KO assigned	KEQ58933.1	TIA32066.1	95.334	643	29	1	120	761	122	764	0	1255
no KO assigned	KEQ58933.1	THZ37082.1	95.334	643	29	1	120	761	122	764	0	1255
no KO assigned	KEQ58933.1	THY94987.1	95.334	643	29	1	120	761	122	764	0	1255
no KO assigned	KEQ58933.1	THZ20229.1	95.334	643	29	1	120	761	122	764	0	1255
no KO assigned	KEQ58933.1	THZ34668.1	95.334	643	29	1	120	761	122	764	0	1255
no KO assigned	KEQ58933.1	THZ16187.1	95.334	643	29	1	120	761	122	764	0	1255
no KO assigned	KEQ58933.1	THY89050.1	95.334	643	29	1	120	761	122	764	0	1255
no KO assigned	KEQ58933.1	THY53204.1	95.334	643	29	1	120	761	122	764	0	1255
no KO assigned	KEQ58933.1	THY17964.1	95.334	643	29	1	120	761	122	764	0	1255
no KO assigned	KEQ58933.1	THX55161.1	95.334	643	29	1	120	761	122	764	0	1255
no KO assigned	KEQ58933.1	THX38959.1	95.334	643	29	1	120	761	122	764	0	1255
no KO assigned	KEQ58933.1	THX15310.1	95.334	643	29	1	120	761	122	764	0	1255
no KO assigned	KEQ58933.1	THY77723.1	95.334	643	29	1	120	761	122	764	0	1255
no KO assigned	KEQ58933.1	THY39553.1	95.334	643	29	1	120	761	122	764	0	1255
no KO assigned	KEQ58933.1	THY39651.1	95.334	643	29	1	120	761	122	764	0	1255
no KO assigned	KEQ58933.1	THY31718.1	95.334	643	29	1	120	761	122	764	0	1255
no KO assigned	KEQ58933.1	THX94676.1	95.334	643	29	1	120	761	122	764	0	1255
no KO assigned	KEQ58933.1	THX76803.1	95.334	643	29	1	120	761	122	764	0	1255
no KO assigned	KEQ58933.1	THX81245.1	95.334	643	29	1	120	761	122	764	0	1255
no KO assigned	KEQ58933.1	THX81091.1	95.334	643	29	1	120	761	122	764	0	1255
no KO assigned	KEQ58933.1	THX40318.1	95.334	643	29	1	120	761	122	764	0	1255
no KO assigned	KEQ58933.1	THX24652.1	95.334	643	29	1	120	761	122	764	0	1255
no KO assigned	KEQ58933.1	THX02898.1	95.334	643	29	1	120	761	122	764	0	1255
no KO assigned	KEQ58933.1	THX08516.1	95.334	643	29	1	120	761	122	764	0	1255
no KO assigned	KEQ58933.1	THW38106.1	95.334	643	29	1	120	761	122	764	0	1255
no KO assigned	KEQ58933.1	THW31407.1	95.334	643	29	1	120	761	122	764	0	1255
no KO assigned	KEQ58933.1	THV94100.1	95.334	643	29	1	120	761	122	764	0	1255
no KO assigned	KEQ58933.1	THV79001.1	95.334	643	29	1	120	761	122	764	0	1255
no KO assigned	KEQ58933.1	THW14827.1	95.334	643	29	1	120	761	122	764	0	1255
no KO assigned	KEQ58933.1	THV65375.1	95.334	643	29	1	120	761	122	764	0	1255
no KO assigned	KEQ58933.1	OBW64750.1	95.334	643	29	1	120	761	122	764	0	1255
no KO assigned	KEQ58933.1	THW00875.1	95.179	643	30	1	120	761	137	779	0	1253
no KO assigned	KEQ58933.1	CAD0040936.1	89.813	697	50	3	1	677	5	700	0	1191
no KO assigned	KEQ58933.1	CAD0083315.1	91.486	646	19	2	120	744	122	752	0	1187
no KO assigned	KEQ58933.1	CAD0018582.1	88.973	662	30	3	120	761	122	760	0	1186
no KO assigned	KEQ58933.1	CAD0030256.1	88.491	643	29	3	120	761	122	720	0	1141

## Sheet: AmyR
KEGG Orthology (KO)	Reference	subject acc.ver	% identity	alignment length	mismatches	gap opens	q. start	q. end	s. start	s. end	evalue	bit score
no KO assigned	KEQ62738.1	KAH0339278.1	100	611	0	0	1	611	1	611	0	1276
no KO assigned	KEQ62738.1	KAG9947233.1	99.836	611	1	0	1	611	1	611	0	1274
no KO assigned	KEQ62738.1	KAH0264634.1	99.673	611	2	0	1	611	1	611	0	1273
no KO assigned	KEQ62738.1	KAH0311055.1	99.345	611	4	0	1	611	1	611	0	1271
no KO assigned	KEQ62738.1	KAG9768277.1	99.345	611	4	0	1	611	1	611	0	1271
no KO assigned	KEQ62738.1	KAG9672980.1	99.345	611	4	0	1	611	1	611	0	1271
no KO assigned	KEQ62738.1	KAG9892925.1	98.691	611	8	0	1	611	1	611	0	1261
no KO assigned	KEQ62738.1	KAH0404695.1	98.363	611	10	0	1	611	1	611	0	1260
no KO assigned	KEQ62738.1	KAH0312542.1	98.691	611	8	0	1	611	1	611	0	1260
no KO assigned	KEQ62738.1	KAG9968600.1	98.691	611	8	0	1	611	1	611	0	1260
no KO assigned	KEQ62738.1	KAG9829937.1	98.691	611	8	0	1	611	1	611	0	1260
no KO assigned	KEQ62738.1	KAG9776406.1	98.691	611	8	0	1	611	1	611	0	1260
no KO assigned	KEQ62738.1	KAG9683841.1	98.691	611	8	0	1	611	1	611	0	1260
no KO assigned	KEQ62738.1	KAG9763037.1	98.363	611	10	0	1	611	1	611	0	1259
no KO assigned	KEQ62738.1	KAG9637950.1	98.363	611	10	0	1	611	1	611	0	1259
no KO assigned	KEQ62738.1	KAG9965087.1	98.363	611	10	0	1	611	1	611	0	1258
no KO assigned	KEQ62738.1	KAG9525926.1	98.2	611	11	0	1	611	1	611	0	1258
no KO assigned	KEQ62738.1	KAH0386468.1	98.2	611	11	0	1	611	1	611	0	1257
no KO assigned	KEQ62738.1	KAH0364058.1	98.691	611	8	0	1	611	1	611	0	1256
no KO assigned	KEQ62738.1	KAH0262333.1	98.2	611	11	0	1	611	1	611	0	1254
no KO assigned	KEQ62738.1	KAH0174004.1	97.709	611	14	0	1	611	1	611	0	1251
no KO assigned	KEQ62738.1	KAH0236153.1	97.709	611	14	0	1	611	1	611	0	1250
no KO assigned	KEQ62738.1	KAH0250153.1	97.709	611	14	0	1	611	1	611	0	1250
no KO assigned	KEQ62738.1	KAH0194069.1	97.709	611	14	0	1	611	1	611	0	1250
no KO assigned	KEQ62738.1	KAH0200630.1	97.709	611	14	0	1	611	1	611	0	1250
no KO assigned	KEQ62738.1	KAG9913159.1	97.545	611	15	0	1	611	1	611	0	1249
no KO assigned	KEQ62738.1	KAG9828820.1	97.545	611	15	0	1	611	1	611	0	1249
no KO assigned	KEQ62738.1	KAG9517436.1	97.545	611	15	0	1	611	1	611	0	1249
no KO assigned	KEQ62738.1	CAD0089407.1	96.569	612	20	1	1	611	1	612	0	1229
no KO assigned	KEQ62738.1	CAD0109028.1	96.399	611	20	1	1	611	1	609	0	1226
no KO assigned	KEQ62738.1	CAD0089281.1	96.236	611	21	1	1	611	1	609	0	1203
no KO assigned	KEQ62738.1	CAD0023380.1	93.627	612	32	2	1	611	1	606	0	1194
no KO assigned	KEQ62738.1	TIA35792.1	93.627	612	32	2	1	611	1	606	0	1194
no KO assigned	KEQ62738.1	CAD0016805.1	93.627	612	32	2	1	611	1	606	0	1194
no KO assigned	KEQ62738.1	KAG2162446.1	93.627	612	32	2	1	611	1	606	0	1194
no KO assigned	KEQ62738.1	THX13392.1	93.627	612	32	2	1	611	1	606	0	1194
no KO assigned	KEQ62738.1	KEQ87728.1	93.627	612	32	2	1	611	1	606	0	1194
no KO assigned	KEQ62738.1	THY10924.1	93.464	612	33	2	1	611	1	606	0	1193
no KO assigned	KEQ62738.1	CAC9893477.1	93.464	612	33	2	1	611	1	606	0	1193
no KO assigned	KEQ62738.1	TIA82228.1	93.464	612	33	2	1	611	1	606	0	1193
no KO assigned	KEQ62738.1	CAD0057032.1	93.464	612	33	2	1	611	1	606	0	1191
no KO assigned	KEQ62738.1	CAD0044096.1	93.301	612	34	2	1	611	1	606	0	1190
no KO assigned	KEQ62738.1	THY33244.1	92.974	612	36	2	1	611	1	606	0	1185
no KO assigned	KEQ62738.1	KEQ73634.1	92.799	611	34	1	1	611	1	601	0	1183
no KO assigned	KEQ62738.1	KAH0283928.1	92.799	611	34	1	1	611	1	601	0	1181
no KO assigned	KEQ62738.1	KER00554.1	93.537	588	38	0	24	611	1	588	0	1157
no KO assigned	KEQ62738.1	KAG9544651.1	98.917	554	6	0	58	611	1	554	0	1147
no KO assigned	KEQ62738.1	KAH0276265.1	99.275	552	4	0	60	611	1	552	0	1147
no KO assigned	KEQ62738.1	THW74518.1	96.283	565	21	0	47	611	2	566	0	1147
no KO assigned	KEQ62738.1	TIA49933.1	96.283	565	21	0	47	611	2	566	0	1146
no KO assigned	KEQ62738.1	THZ56386.1	96.283	565	21	0	47	611	2	566	0	1146
no KO assigned	KEQ62738.1	TIA09075.1	96.283	565	21	0	47	611	2	566	0	1146
no KO assigned	KEQ62738.1	THZ91247.1	96.283	565	21	0	47	611	2	566	0	1146
no KO assigned	KEQ62738.1	THZ42181.1	96.283	565	21	0	47	611	2	566	0	1146
no KO assigned	KEQ62738.1	THY73346.1	96.283	565	21	0	47	611	2	566	0	1146
no KO assigned	KEQ62738.1	THW60985.1	96.283	565	21	0	47	611	2	566	0	1146
no KO assigned	KEQ62738.1	THZ71898.1	96.283	565	21	0	47	611	2	566	0	1146
no KO assigned	KEQ62738.1	THZ08480.1	96.283	565	21	0	47	611	2	566	0	1146
no KO assigned	KEQ62738.1	THW20121.1	96.283	565	21	0	47	611	2	566	0	1146
no KO assigned	KEQ62738.1	TIA62565.1	96.283	565	21	0	47	611	2	566	0	1145
no KO assigned	KEQ62738.1	TIA03351.1	96.283	565	21	0	47	611	2	566	0	1145
no KO assigned	KEQ62738.1	THZ88539.1	96.283	565	21	0	47	611	2	566	0	1145
no KO assigned	KEQ62738.1	THY96820.1	96.283	565	21	0	47	611	2	566	0	1145
no KO assigned	KEQ62738.1	THZ24276.1	96.283	565	21	0	47	611	2	566	0	1145
no KO assigned	KEQ62738.1	THZ28593.1	96.283	565	21	0	47	611	2	566	0	1145
no KO assigned	KEQ62738.1	THY50633.1	96.283	565	21	0	47	611	2	566	0	1145
no KO assigned	KEQ62738.1	THY04795.1	96.283	565	21	0	47	611	2	566	0	1145
no KO assigned	KEQ62738.1	THX59992.1	96.283	565	21	0	47	611	2	566	0	1145
no KO assigned	KEQ62738.1	THY60735.1	96.283	565	21	0	47	611	2	566	0	1145
no KO assigned	KEQ62738.1	THY03157.1	96.283	565	21	0	47	611	2	566	0	1145
no KO assigned	KEQ62738.1	THX81995.1	96.283	565	21	0	47	611	2	566	0	1145
no KO assigned	KEQ62738.1	THX83190.1	96.283	565	21	0	47	611	2	566	0	1145
no KO assigned	KEQ62738.1	THX06491.1	96.283	565	21	0	47	611	2	566	0	1145
no KO assigned	KEQ62738.1	THW01727.1	96.283	565	21	0	47	611	2	566	0	1145
no KO assigned	KEQ62738.1	THW64238.1	96.283	565	21	0	47	611	2	566	0	1145
no KO assigned	KEQ62738.1	THW23669.1	96.283	565	21	0	47	611	2	566	0	1145
no KO assigned	KEQ62738.1	THV94421.1	96.283	565	21	0	47	611	2	566	0	1145
no KO assigned	KEQ62738.1	THV83648.1	96.283	565	21	0	47	611	2	566	0	1145
no KO assigned	KEQ62738.1	KAH0276477.1	98.915	553	6	0	59	611	1	553	0	1145
no KO assigned	KEQ62738.1	THZ53719.1	96.106	565	22	0	47	611	2	566	0	1144
no KO assigned	KEQ62738.1	THX64452.1	96.106	565	22	0	47	611	2	566	0	1144
no KO assigned	KEQ62738.1	THX94020.1	96.106	565	22	0	47	611	2	566	0	1144
no KO assigned	KEQ62738.1	THX31491.1	96.106	565	22	0	47	611	2	566	0	1144
no KO assigned	KEQ62738.1	THW87901.1	96.106	565	22	0	47	611	2	566	0	1144
no KO assigned	KEQ62738.1	THW41027.1	96.106	565	22	0	47	611	2	566	0	1144
no KO assigned	KEQ62738.1	THW40048.1	96.106	565	22	0	47	611	2	566	0	1144
no KO assigned	KEQ62738.1	THV75819.1	96.106	565	22	0	47	611	2	566	0	1144
no KO assigned	KEQ62738.1	TIA19983.1	96.106	565	22	0	47	611	2	566	0	1144
no KO assigned	KEQ62738.1	THX42808.1	96.106	565	22	0	47	611	2	566	0	1143
no KO assigned	KEQ62738.1	THY52669.1	96.106	565	22	0	47	611	2	566	0	1143
no KO assigned	KEQ62738.1	THX20820.1	96.106	565	22	0	47	611	2	566	0	1142
no KO assigned	KEQ62738.1	KAH0000161.1	97.786	542	12	0	1	542	1	542	0	1115
no KO assigned	KEQ62738.1	KAG9630192.1	98.4	500	8	0	1	500	1	500	0	1030

## Sheet: AreA
KEGG Orthology (KO)	Reference	subject acc.ver	% identity	alignment length	mismatches	gap opens	q. start	q. end	s. start	s. end	evalue	bit score
no KO assigned	KEQ59671.1	KAH0340734.1	100	853	0	0	1	853	11	863	0	1740
no KO assigned	KEQ59671.1	KAG9953217.1	100	853	0	0	1	853	11	863	0	1740
no KO assigned	KEQ59671.1	KAH0318638.1	99.297	853	6	0	1	853	11	863	0	1730
no KO assigned	KEQ59671.1	KAG9771194.1	99.297	853	6	0	1	853	11	863	0	1730
no KO assigned	KEQ59671.1	KAG9663175.1	99.297	853	6	0	1	853	11	863	0	1730
no KO assigned	KEQ59671.1	KAH0255761.1	99.179	853	7	0	1	853	11	863	0	1727
no KO assigned	KEQ59671.1	KAH0367914.1	97.773	853	17	1	1	853	11	861	0	1704
no KO assigned	KEQ59671.1	KAG9964904.1	96.952	853	25	1	1	853	11	862	0	1685
no KO assigned	KEQ59671.1	KAG9600228.1	96.952	853	25	1	1	853	11	862	0	1685
no KO assigned	KEQ59671.1	KAG9779305.1	96.835	853	21	1	1	853	11	857	0	1683
no KO assigned	KEQ59671.1	KAG9686029.1	96.835	853	21	1	1	853	11	857	0	1683
no KO assigned	KEQ59671.1	KAH0315757.1	96.835	853	21	1	1	853	11	857	0	1682
no KO assigned	KEQ59671.1	KAH0353850.1	96.717	853	27	1	1	853	11	862	0	1680
no KO assigned	KEQ59671.1	KAH0230183.1	96.6	853	28	1	1	853	11	862	0	1680
no KO assigned	KEQ59671.1	KAH0211299.1	96.6	853	28	1	1	853	11	862	0	1680
no KO assigned	KEQ59671.1	KAH0244122.1	96.6	853	28	1	1	853	11	862	0	1680
no KO assigned	KEQ59671.1	KAH0187436.1	96.6	853	28	1	1	853	11	862	0	1680
no KO assigned	KEQ59671.1	KAH0198186.1	96.6	853	28	1	1	853	11	862	0	1680
no KO assigned	KEQ59671.1	KAG9669314.1	96.6	853	28	1	1	853	11	862	0	1680
no KO assigned	KEQ59671.1	KAH0267987.1	96.266	857	27	2	1	853	11	866	0	1677
no KO assigned	KEQ59671.1	KAG9596213.1	96.952	853	24	2	1	853	11	861	0	1677
no KO assigned	KEQ59671.1	KAG9530015.1	96.149	857	28	2	1	853	11	866	0	1676
no KO assigned	KEQ59671.1	KAG9519355.1	96.131	853	30	2	1	853	11	860	0	1667
no KO assigned	KEQ59671.1	KAH0384873.1	96.014	853	27	2	1	853	11	856	0	1664
no KO assigned	KEQ59671.1	KAH0402916.1	95.897	853	26	2	1	853	11	854	0	1661
no KO assigned	KEQ59671.1	KAG9822598.1	97.19	783	21	1	71	853	1	782	0	1552
no KO assigned	KEQ59671.1	KAG9998251.1	96.552	783	26	1	71	853	1	782	0	1541
no KO assigned	KEQ59671.1	KAG9889535.1	97.139	769	21	1	85	853	1	768	0	1524
no KO assigned	KEQ59671.1	KEQ72891.1	90.369	841	71	3	15	853	11	843	0	1521
no KO assigned	KEQ59671.1	KAG9633751.1	96.879	769	23	1	85	853	1	768	0	1520
no KO assigned	KEQ59671.1	CAD0111118.1	87.444	892	69	3	1	853	1	888	0	1519
no KO assigned	KEQ59671.1	KAG9633974.1	96.749	769	19	1	85	853	1	763	0	1518
no KO assigned	KEQ59671.1	KEQ96573.1	88.863	853	92	2	1	853	1	850	0	1489
no KO assigned	KEQ59671.1	THX79287.1	90.047	854	78	6	1	853	1	848	0	1467
no KO assigned	KEQ59671.1	THY89881.1	89.836	856	80	6	1	853	1	852	0	1462
no KO assigned	KEQ59671.1	THY35008.1	89.578	854	78	6	1	853	1	844	0	1456
no KO assigned	KEQ59671.1	THX68451.1	89.696	854	77	6	1	853	1	844	0	1456
no KO assigned	KEQ59671.1	THZ29741.1	89.461	854	77	6	1	853	1	842	0	1455
no KO assigned	KEQ59671.1	KEQ85528.1	89.461	854	77	6	1	853	1	842	0	1455
no KO assigned	KEQ59671.1	TIA62013.1	89.461	854	79	6	1	853	1	844	0	1454
no KO assigned	KEQ59671.1	THW79213.1	89.578	854	78	6	1	853	1	844	0	1454
no KO assigned	KEQ59671.1	THV66022.1	89.578	854	78	6	1	853	1	844	0	1454
no KO assigned	KEQ59671.1	TIA75776.1	89.813	854	78	6	1	853	1	846	0	1454
no KO assigned	KEQ59671.1	TIA86225.1	89.461	854	79	6	1	853	1	844	0	1454
no KO assigned	KEQ59671.1	THZ59447.1	89.813	854	78	6	1	853	1	846	0	1454
no KO assigned	KEQ59671.1	TIA15637.1	89.578	854	78	6	1	853	1	844	0	1454
no KO assigned	KEQ59671.1	THZ88494.1	89.813	854	78	6	1	853	1	846	0	1454
no KO assigned	KEQ59671.1	THZ92011.1	89.461	854	77	6	1	853	1	842	0	1454
no KO assigned	KEQ59671.1	THZ45648.1	89.813	854	78	6	1	853	1	846	0	1454
no KO assigned	KEQ59671.1	THZ13973.1	89.578	854	78	6	1	853	1	844	0	1454
no KO assigned	KEQ59671.1	THY91731.1	89.578	854	78	6	1	853	1	844	0	1454
no KO assigned	KEQ59671.1	THY91281.1	89.813	854	78	6	1	853	1	846	0	1454
no KO assigned	KEQ59671.1	THY66305.1	89.813	854	78	6	1	853	1	846	0	1454
no KO assigned	KEQ59671.1	THY19857.1	89.578	854	78	6	1	853	1	844	0	1454
no KO assigned	KEQ59671.1	THX14433.1	89.578	854	78	6	1	853	1	844	0	1454
no KO assigned	KEQ59671.1	THY73087.1	89.813	854	78	6	1	853	1	846	0	1454
no KO assigned	KEQ59671.1	THY06694.1	89.578	854	78	6	1	853	1	844	0	1454
no KO assigned	KEQ59671.1	THX66415.1	89.813	854	78	6	1	853	1	846	0	1454
no KO assigned	KEQ59671.1	THX26082.1	89.578	854	78	6	1	853	1	844	0	1454
no KO assigned	KEQ59671.1	THX02001.1	89.578	854	78	6	1	853	1	844	0	1454
no KO assigned	KEQ59671.1	THW95665.1	89.578	854	78	6	1	853	1	844	0	1454
no KO assigned	KEQ59671.1	THW01085.1	89.461	854	77	6	1	853	1	842	0	1454
no KO assigned	KEQ59671.1	THW66665.1	89.461	854	77	6	1	853	1	842	0	1454
no KO assigned	KEQ59671.1	THW47762.1	89.813	854	78	6	1	853	1	846	0	1454
no KO assigned	KEQ59671.1	THV92631.1	89.461	854	79	6	1	853	11	854	0	1454
no KO assigned	KEQ59671.1	THV87650.1	89.813	854	78	6	1	853	1	846	0	1454
no KO assigned	KEQ59671.1	THW69882.1	89.578	854	78	6	1	853	1	844	0	1454
no KO assigned	KEQ59671.1	TIA49430.1	89.813	854	78	6	1	853	1	846	0	1454
no KO assigned	KEQ59671.1	THX57185.1	89.578	854	78	6	1	853	1	844	0	1454
no KO assigned	KEQ59671.1	THX52734.1	89.461	854	79	6	1	853	1	844	0	1453
no KO assigned	KEQ59671.1	THY42167.1	89.344	854	78	6	1	853	1	842	0	1453
no KO assigned	KEQ59671.1	THX29902.1	89.461	854	79	6	1	853	1	844	0	1453
no KO assigned	KEQ59671.1	THZ79354.1	89.461	854	79	6	1	853	1	844	0	1453
no KO assigned	KEQ59671.1	THY31497.1	89.461	854	79	6	1	853	11	854	0	1453
no KO assigned	KEQ59671.1	THW33434.1	89.578	854	78	6	1	853	1	844	0	1452
no KO assigned	KEQ59671.1	TIA24847.1	89.696	854	79	6	1	853	1	846	0	1452
no KO assigned	KEQ59671.1	THZ88783.1	89.461	854	79	6	1	853	1	844	0	1452
no KO assigned	KEQ59671.1	TIA34232.1	89.696	854	79	6	1	853	1	846	0	1452
no KO assigned	KEQ59671.1	THY63057.1	89.344	854	78	6	1	853	1	842	0	1451
no KO assigned	KEQ59671.1	THW27325.1	89.344	854	78	6	1	853	1	842	0	1451
no KO assigned	KEQ59671.1	THZ45878.1	89.344	854	80	6	1	853	1	844	0	1450
no KO assigned	KEQ59671.1	THW22595.1	89.344	854	80	6	1	853	1	844	0	1449
no KO assigned	KEQ59671.1	CAD0084879.1	85.085	885	83	7	1	853	1	868	0	1442
no KO assigned	KEQ59671.1	CAC9889802.1	85.682	894	79	8	1	853	1	886	0	1432
no KO assigned	KEQ59671.1	CAD0015735.1	85.347	894	80	8	1	853	1	884	0	1429
no KO assigned	KEQ59671.1	CAD0052138.1	85.235	894	79	8	1	853	1	882	0	1429
no KO assigned	KEQ59671.1	CAD0027851.1	85.235	894	81	8	1	853	1	884	0	1428
no KO assigned	KEQ59671.1	THX10268.1	87.354	854	73	7	25	853	17	860	0	1424
no KO assigned	KEQ59671.1	CAD0058407.1	85.011	894	81	8	1	853	1	882	0	1424
no KO assigned	KEQ59671.1	KAG2164660.1	87.939	854	77	7	1	853	11	839	0	1410

## Sheet: AreB
KEGG Orthology (KO)	Reference	subject acc.ver	% identity	alignment length	mismatches	gap opens	q. start	q. end	s. start	s. end	evalue	bit score
K09184	KEQ63290.1	KAH0340087.1	100	300	0	0	1	300	115	414	0	614
K09184	KEQ63290.1	KAG9945790.1	99.667	300	1	0	1	300	115	414	0	612
K09184	KEQ63290.1	KAH0365654.1	99.333	300	2	0	1	300	115	414	0	610
K09184	KEQ63290.1	KAH0322870.1	99	300	3	0	1	300	115	414	0	608
K09184	KEQ63290.1	KAG9785846.1	99	300	3	0	1	300	115	414	0	608
K09184	KEQ63290.1	KAG9690046.1	99	300	3	0	1	300	115	414	0	608
K09184	KEQ63290.1	KAH0259191.1	99	300	3	0	1	300	115	414	0	608
K09184	KEQ63290.1	KAG9620347.1	97.674	301	6	1	1	300	8	308	0	603
K09184	KEQ63290.1	KAH0320191.1	97.674	301	6	1	1	300	115	415	0	602
K09184	KEQ63290.1	KAG9783349.1	97.674	301	6	1	1	300	115	415	0	602
K09184	KEQ63290.1	KAG9674612.1	97.674	301	6	1	1	300	115	415	0	602
K09184	KEQ63290.1	KAG9636928.1	97.342	301	7	1	1	300	8	308	0	602
K09184	KEQ63290.1	KAH0417181.1	97.674	301	6	1	1	300	115	415	0	602
K09184	KEQ63290.1	KAH0084700.1	97.342	301	7	1	1	300	1	301	0	602
K09184	KEQ63290.1	KAG9863695.1	97.674	301	6	1	1	300	115	415	0	602
K09184	KEQ63290.1	KAG9927619.1	97.342	301	7	1	1	300	115	415	0	600
K09184	KEQ63290.1	KAG9739587.1	97.342	301	7	1	1	300	115	415	0	600
K09184	KEQ63290.1	KAH0348851.1	97.342	301	7	1	1	300	115	415	0	600
K09184	KEQ63290.1	KAH0303816.1	97.342	301	7	1	1	300	115	415	0	600
K09184	KEQ63290.1	KAH0159945.1	97.342	301	7	1	1	300	115	415	0	600
K09184	KEQ63290.1	KAH0212777.1	97.342	301	7	1	1	300	115	415	0	600
K09184	KEQ63290.1	KAH0034476.1	97.342	301	7	1	1	300	115	415	0	600
K09184	KEQ63290.1	KAG9965740.1	97.342	301	7	1	1	300	115	415	0	600
K09184	KEQ63290.1	KAG9766413.1	97.342	301	7	1	1	300	115	415	0	600
K09184	KEQ63290.1	KAG9643033.1	97.342	301	7	1	1	300	115	415	0	600
K09184	KEQ63290.1	KAG9556827.1	97.342	301	7	1	1	300	115	415	0	600
K09184	KEQ63290.1	KAH0257654.1	97.342	301	7	1	1	300	115	415	0	599
K09184	KEQ63290.1	KAG9690369.1	97.342	301	7	1	1	300	1	301	0	599
K09184	KEQ63290.1	KAH0159586.1	97.342	301	7	1	1	300	115	415	0	599
K09184	KEQ63290.1	KAH0201671.1	97.342	301	7	1	1	300	115	415	0	599
K09184	KEQ63290.1	KAH0122297.1	97.342	301	7	1	1	300	115	415	0	599
K09184	KEQ63290.1	KAH0033801.1	97.342	301	7	1	1	300	115	415	0	599
K09184	KEQ63290.1	KAH0015210.1	97.342	301	7	1	1	300	115	415	0	599
K09184	KEQ63290.1	KAH0297014.1	96.678	301	9	1	1	300	115	415	0	596
K09184	KEQ63290.1	KAH0235408.1	96.678	301	9	1	1	300	115	415	0	596
K09184	KEQ63290.1	KAH0228584.1	96.678	301	9	1	1	300	115	415	0	596
K09184	KEQ63290.1	KAH0248570.1	96.678	301	9	1	1	300	115	415	0	596
K09184	KEQ63290.1	KAH0172734.1	96.678	301	9	1	1	300	115	415	0	596
K09184	KEQ63290.1	KAH0192197.1	96.678	301	9	1	1	300	115	415	0	596
K09184	KEQ63290.1	KAH0205976.1	96.678	301	9	1	1	300	115	415	0	596
K09184	KEQ63290.1	KAG9737455.1	96.678	301	9	1	1	300	115	415	0	596
K09184	KEQ63290.1	KAG9677482.1	96.678	301	9	1	1	300	115	415	0	596
K09184	KEQ63290.1	KAG9552911.1	96.678	301	9	1	1	300	115	415	0	596
K09184	KEQ63290.1	KAG9518326.1	96.678	301	9	1	1	300	115	415	0	596
K09184	KEQ63290.1	KAH0387197.1	96.013	301	11	1	1	300	115	415	0	593
K09184	KEQ63290.1	KAG9530863.1	96.013	301	11	1	1	300	115	415	0	593
K09184	KEQ63290.1	KAH0006138.1	95.681	301	12	1	1	300	115	415	0	589
K09184	KEQ63290.1	CAD0093114.1	93.59	312	8	3	1	300	25	336	0	587
K09184	KEQ63290.1	CAD0084324.1	89.935	308	21	3	1	298	78	385	0	557
K09184	KEQ63290.1	KAH0028992.1	97.122	278	7	1	24	300	1	278	0	553
K09184	KEQ63290.1	CAD0110833.1	92.333	300	16	4	1	298	66	360	0	552
K09184	KEQ63290.1	THY00739.1	90.667	300	24	4	1	298	116	413	0	546
K09184	KEQ63290.1	THY07840.1	90.333	300	25	4	1	298	14	311	0	546
K09184	KEQ63290.1	THY32637.1	91.753	291	21	3	1	289	31	320	0	545
K09184	KEQ63290.1	KAH0283501.1	91.246	297	18	3	1	290	114	409	0	545
K09184	KEQ63290.1	TIA50126.1	91.753	291	21	3	1	289	14	303	0	545
K09184	KEQ63290.1	THZ62625.1	91.753	291	21	3	1	289	14	303	0	545
K09184	KEQ63290.1	THZ46200.1	91.753	291	21	3	1	289	14	303	0	545
K09184	KEQ63290.1	THZ09780.1	90.333	300	25	4	1	298	1	298	0	545
K09184	KEQ63290.1	THY75638.1	91.753	291	21	3	1	289	14	303	0	545
K09184	KEQ63290.1	TIA58092.1	91.753	291	21	3	1	289	4	293	0	544
K09184	KEQ63290.1	THZ86249.1	90.667	300	24	4	1	298	92	389	0	544
K09184	KEQ63290.1	THX91491.1	91.753	291	21	3	1	289	136	425	0	544
K09184	KEQ63290.1	THW46375.1	91.753	291	21	3	1	289	4	293	0	544
K09184	KEQ63290.1	TIA26389.1	91.753	291	21	3	1	289	1	290	0	544
K09184	KEQ63290.1	THW98854.1	91.753	291	21	3	1	289	60	349	0	544
K09184	KEQ63290.1	THX76582.1	91.753	291	21	3	1	289	1	290	0	544
K09184	KEQ63290.1	THW50374.1	91.753	291	21	3	1	289	1	290	0	544
K09184	KEQ63290.1	THW59254.1	91.753	291	21	3	1	289	1	290	0	544
K09184	KEQ63290.1	KAG2166506.1	90.333	300	25	4	1	298	116	413	0	543
K09184	KEQ63290.1	TIA62031.1	90.333	300	25	4	1	298	116	413	0	543
K09184	KEQ63290.1	TIA78070.1	90.333	300	25	4	1	298	116	413	0	543
K09184	KEQ63290.1	TIA16689.1	90.333	300	25	4	1	298	116	413	0	543
K09184	KEQ63290.1	TIA41359.1	90.333	300	25	4	1	298	116	413	0	543
K09184	KEQ63290.1	THY96368.1	90.333	300	25	4	1	298	116	413	0	543
K09184	KEQ63290.1	THZ29787.1	90.333	300	25	4	1	298	116	413	0	543
K09184	KEQ63290.1	THZ52169.1	90.333	300	25	4	1	298	116	413	0	543
K09184	KEQ63290.1	THX53314.1	90.333	300	25	4	1	298	116	413	0	543
K09184	KEQ63290.1	THY43010.1	90.333	300	25	4	1	298	116	413	0	543
K09184	KEQ63290.1	THX94749.1	90.333	300	25	4	1	298	116	413	0	543
K09184	KEQ63290.1	THX32510.1	90.333	300	25	4	1	298	116	413	0	543
K09184	KEQ63290.1	THX11075.1	90.333	300	25	4	1	298	116	413	0	543
K09184	KEQ63290.1	THV97998.1	90.333	300	25	4	1	298	116	413	0	543
K09184	KEQ63290.1	THZ80561.1	90.333	300	25	4	1	298	92	389	0	543
K09184	KEQ63290.1	TIA04997.1	90.333	300	25	4	1	298	92	389	0	543
K09184	KEQ63290.1	THY89124.1	90.333	300	25	4	1	298	92	389	0	543
K09184	KEQ63290.1	THX53885.1	90.333	300	25	4	1	298	92	389	0	543
K09184	KEQ63290.1	THY61590.1	90.333	300	25	4	1	298	92	389	0	543
K09184	KEQ63290.1	THV87296.1	90.333	300	25	4	1	298	92	389	0	543
K09184	KEQ63290.1	KEQ71512.1	94.326	282	14	2	1	281	9	289	0	543
K09184	KEQ63290.1	THW87281.1	90.333	300	25	4	1	298	116	413	0	542
K09184	KEQ63290.1	THW19892.1	91.409	291	22	3	1	289	1	290	0	542
K09184	KEQ63290.1	THZ71147.1	90	300	26	4	1	298	116	413	0	542
K09184	KEQ63290.1	THW07697.1	90	300	26	4	1	298	92	389	0	540
K09184	KEQ63290.1	KEQ83634.1	90.508	295	21	4	1	289	1	294	0	539
K09184	KEQ63290.1	THX83373.1	90.722	291	24	3	1	289	14	303	0	538
K09184	KEQ63290.1	CAD0050378.1	87.255	306	21	4	1	289	31	335	0	536
K09184	KEQ63290.1	CAD0018120.1	87.255	306	21	4	1	289	15	319	0	535
K09184	KEQ63290.1	CAC9889373.1	87.255	306	21	4	1	289	15	319	0	535
K09184	KEQ63290.1	CAD0026696.1	87.255	306	21	4	1	289	15	319	0	535
K09184	KEQ63290.1	KAG9878154.1	97.328	262	6	1	1	261	8	269	0	531
K09184	KEQ63290.1	KAG9978273.1	97.328	262	6	1	1	261	115	376	0	531
K09184	KEQ63290.1	KAG9883656.1	97.328	262	6	1	1	261	115	376	0	531
K09184	KEQ63290.1	KAG9826919.1	97.328	262	6	1	1	261	115	376	0	531
K09184	KEQ63290.1	THZ21638.1	90.378	291	21	4	1	289	11	296	0	529
K09184	KEQ63290.1	THY66708.1	90.378	291	21	4	1	289	11	296	0	529
K09184	KEQ63290.1	THW78715.1	90.378	291	21	4	1	289	11	296	0	529
K09184	KEQ63290.1	THW63746.1	90.378	291	21	4	1	289	11	296	0	529
K09184	KEQ63290.1	KAG9978243.1	96.947	262	7	1	1	261	115	376	0	527
K09184	KEQ63290.1	KAG9883664.1	96.947	262	7	1	1	261	115	376	0	527
K09184	KEQ63290.1	KAG9922236.1	96.947	262	7	1	1	261	115	376	0	527
K09184	KEQ63290.1	KAG9842491.1	96.947	262	7	1	1	261	115	376	0	527
K09184	KEQ63290.1	THX12631.1	90.034	291	22	4	1	289	11	296	0	527
K09184	KEQ63290.1	THV76090.1	90.034	291	22	4	1	289	11	296	0	527
K09184	KEQ63290.1	THW18603.1	90.034	291	22	4	1	289	11	296	0	527
K09184	KEQ63290.1	CAD0053700.1	82.099	324	22	5	1	289	50	372	0	522
K09184	KEQ63290.1	THX37445.1	85.113	309	21	5	1	289	11	314	0	518
K09184	KEQ63290.1	KEQ97768.1	84.768	302	41	3	1	300	4	302	2.53e-177	495

## Sheet: Cat8
KEGG Orthology (KO)	Reference	subject acc.ver	% identity	alignment length	mismatches	gap opens	q. start	q. end	s. start	s. end	evalue	bit score
K09240	KEQ62702.1	KAH0345686.1	100	898	0	0	1	898	1	898	0	1856
K09240	KEQ62702.1	KAG9947134.1	98.998	898	9	0	1	898	1	898	0	1839
K09240	KEQ62702.1	KAH0267921.1	98.33	898	15	0	1	898	1	898	0	1826
K09240	KEQ62702.1	KAH0328371.1	98.33	898	15	0	1	898	1	898	0	1825
K09240	KEQ62702.1	KAG9794398.1	98.33	898	15	0	1	898	1	898	0	1825
K09240	KEQ62702.1	KAG9686414.1	98.33	898	15	0	1	898	1	898	0	1825
K09240	KEQ62702.1	KAH0315970.1	94.678	902	44	2	1	898	1	902	0	1770
K09240	KEQ62702.1	KAG9549257.1	94.678	902	44	2	1	898	1	902	0	1770
K09240	KEQ62702.1	KAH0103938.1	95.455	902	37	2	1	898	1	902	0	1759
K09240	KEQ62702.1	KAH0210369.1	94.9	902	42	2	1	898	1	902	0	1747
K09240	KEQ62702.1	KAH0244912.1	94.9	902	42	2	1	898	1	902	0	1747
K09240	KEQ62702.1	KAH0188357.1	94.9	902	42	2	1	898	1	902	0	1747
K09240	KEQ62702.1	KAH0195522.1	94.9	902	42	2	1	898	1	902	0	1747
K09240	KEQ62702.1	KAG9671410.1	94.9	902	42	2	1	898	1	902	0	1747
K09240	KEQ62702.1	KAG9517447.1	94.9	902	42	2	1	898	1	902	0	1747
K09240	KEQ62702.1	KAG9528640.1	94.9	902	42	2	1	898	1	902	0	1746
K09240	KEQ62702.1	KAH0386497.1	94.789	902	43	2	1	898	1	902	0	1746
K09240	KEQ62702.1	KAH0364378.1	95.671	901	35	2	1	898	1	900	0	1744
K09240	KEQ62702.1	KAH0013087.1	94.678	902	44	2	1	898	1	902	0	1744
K09240	KEQ62702.1	KAG9759944.1	94.789	902	43	2	1	898	1	902	0	1744
K09240	KEQ62702.1	KAH0171111.1	94.568	902	45	2	1	898	1	902	0	1743
K09240	KEQ62702.1	KAH0403055.1	94.457	902	46	2	1	898	1	902	0	1738
K09240	KEQ62702.1	KAH0038394.1	95.787	902	34	2	1	898	1	902	0	1720
K09240	KEQ62702.1	KAH0375855.1	95.882	850	31	2	53	898	1	850	0	1680
K09240	KEQ62702.1	KAH0176103.1	95.882	850	31	2	53	898	1	850	0	1680
K09240	KEQ62702.1	KAH0217438.1	95.882	850	31	2	53	898	1	850	0	1680
K09240	KEQ62702.1	KAH0117806.1	95.882	850	31	2	53	898	1	850	0	1680
K09240	KEQ62702.1	KAH0059197.1	95.882	850	31	2	53	898	1	850	0	1680
K09240	KEQ62702.1	KAG9945294.1	95.882	850	31	2	53	898	1	850	0	1680
K09240	KEQ62702.1	KAG9870134.1	95.882	850	31	2	53	898	1	850	0	1680
K09240	KEQ62702.1	KAG9648619.1	95.882	850	31	2	53	898	1	850	0	1680
K09240	KEQ62702.1	KAG9700820.1	95.882	850	31	2	53	898	1	850	0	1680
K09240	KEQ62702.1	KAG9601845.1	95.882	850	31	2	53	898	1	850	0	1680
K09240	KEQ62702.1	KAG9963448.1	93.016	902	39	3	1	898	1	882	0	1654
K09240	KEQ62702.1	KAH0269175.1	93.016	902	39	3	1	898	1	882	0	1654
K09240	KEQ62702.1	KAH0355206.1	92.794	902	41	3	1	898	1	882	0	1650
K09240	KEQ62702.1	KAH0314631.1	92.683	902	42	3	1	898	1	882	0	1648
K09240	KEQ62702.1	KAG9549162.1	92.683	902	42	3	1	898	1	882	0	1648
K09240	KEQ62702.1	KAH0132321.1	95.176	850	37	2	53	898	1	850	0	1645
K09240	KEQ62702.1	KAH0320094.1	90.909	902	55	4	1	898	1	879	0	1642
K09240	KEQ62702.1	KAG9788470.1	90.909	902	55	4	1	898	1	879	0	1642
K09240	KEQ62702.1	KAG9690449.1	90.909	902	55	4	1	898	1	879	0	1642
K09240	KEQ62702.1	KAG9935753.1	90.909	902	55	4	1	898	1	879	0	1641
K09240	KEQ62702.1	THW39431.1	88.79	901	96	3	1	898	1	899	0	1634
K09240	KEQ62702.1	KEQ87544.1	88.79	901	96	3	1	898	1	899	0	1632
K09240	KEQ62702.1	KAG2162286.1	88.79	901	96	3	1	898	1	899	0	1632
K09240	KEQ62702.1	TIA32651.1	88.79	901	96	3	1	898	1	899	0	1632
K09240	KEQ62702.1	THZ60199.1	88.79	901	96	3	1	898	1	899	0	1632
K09240	KEQ62702.1	THZ99971.1	88.79	901	96	3	1	898	1	899	0	1632
K09240	KEQ62702.1	THZ84362.1	88.79	901	96	3	1	898	1	899	0	1632
K09240	KEQ62702.1	THZ77293.1	88.79	901	96	3	1	898	1	899	0	1632
K09240	KEQ62702.1	THZ42433.1	88.79	901	96	3	1	898	1	899	0	1632
K09240	KEQ62702.1	THY76372.1	88.79	901	96	3	1	898	1	899	0	1632
K09240	KEQ62702.1	THY60513.1	88.79	901	96	3	1	898	1	899	0	1632
K09240	KEQ62702.1	THY33230.1	88.79	901	96	3	1	898	1	899	0	1632
K09240	KEQ62702.1	THX70441.1	88.79	901	96	3	1	898	1	899	0	1632
K09240	KEQ62702.1	THW74394.1	88.79	901	96	3	1	898	1	899	0	1632
K09240	KEQ62702.1	THW47239.1	88.79	901	96	3	1	898	1	899	0	1632
K09240	KEQ62702.1	THW19216.1	88.79	901	96	3	1	898	1	899	0	1632
K09240	KEQ62702.1	THY95195.1	88.679	901	97	3	1	898	1	899	0	1631
K09240	KEQ62702.1	TIA12123.1	88.679	901	97	3	1	898	1	899	0	1630
K09240	KEQ62702.1	TIA03587.1	88.679	901	97	3	1	898	1	899	0	1630
K09240	KEQ62702.1	THZ01706.1	88.679	901	97	3	1	898	1	899	0	1630
K09240	KEQ62702.1	THW99905.1	88.679	901	97	3	1	898	1	899	0	1630
K09240	KEQ62702.1	THW68624.1	88.679	901	97	3	1	898	1	899	0	1630
K09240	KEQ62702.1	THV71288.1	88.679	901	97	3	1	898	1	899	0	1630
K09240	KEQ62702.1	TIA81862.1	88.679	901	97	3	1	898	1	899	0	1629
K09240	KEQ62702.1	THY87286.1	88.568	901	98	3	1	898	1	899	0	1629
K09240	KEQ62702.1	THY05825.1	88.568	901	98	3	1	898	1	899	0	1629
K09240	KEQ62702.1	THW17141.1	88.568	901	98	3	1	898	1	899	0	1629
K09240	KEQ62702.1	THY35301.1	88.79	901	96	3	1	898	1	899	0	1629
K09240	KEQ62702.1	THY20792.1	88.679	901	97	3	1	898	1	899	0	1628
K09240	KEQ62702.1	TIA43137.1	88.679	901	97	3	1	898	1	899	0	1628
K09240	KEQ62702.1	THZ22340.1	88.568	901	98	3	1	898	1	899	0	1628
K09240	KEQ62702.1	THX43582.1	88.568	901	98	3	1	898	1	899	0	1628
K09240	KEQ62702.1	THX68121.1	88.568	901	98	3	1	898	1	899	0	1627
K09240	KEQ62702.1	TIA16437.1	88.568	901	98	3	1	898	1	899	0	1627
K09240	KEQ62702.1	THX03168.1	88.568	901	98	3	1	898	1	899	0	1627
K09240	KEQ62702.1	THW00616.1	88.568	901	98	3	1	898	1	899	0	1627
K09240	KEQ62702.1	THZ28855.1	88.457	901	99	3	1	898	1	899	0	1625
K09240	KEQ62702.1	TIA56875.1	88.457	901	99	3	1	898	1	899	0	1624
K09240	KEQ62702.1	THY43866.1	88.457	901	99	3	1	898	1	899	0	1624
K09240	KEQ62702.1	THX51289.1	88.457	901	99	3	1	898	1	899	0	1624
K09240	KEQ62702.1	THX00398.1	88.457	901	99	3	1	898	1	899	0	1624
K09240	KEQ62702.1	THX24436.1	88.457	901	99	3	1	898	1	899	0	1624
K09240	KEQ62702.1	THW89230.1	88.457	901	99	3	1	898	1	899	0	1624
K09240	KEQ62702.1	CAD0088815.1	90.252	913	54	7	7	898	1	899	0	1623
K09240	KEQ62702.1	THZ34341.1	88.346	901	100	3	1	898	1	899	0	1622
K09240	KEQ62702.1	THX94737.1	88.346	901	100	3	1	898	1	899	0	1622
K09240	KEQ62702.1	THY44972.1	88.492	895	98	3	7	898	34	926	0	1615
K09240	KEQ62702.1	THV89992.1	88.492	895	98	3	7	898	34	926	0	1615
K09240	KEQ62702.1	THV78061.1	88.492	895	98	3	7	898	34	926	0	1615
K09240	KEQ62702.1	THX55195.1	88.492	895	98	3	7	898	34	926	0	1612
K09240	KEQ62702.1	THW65476.1	88.492	895	98	3	7	898	34	926	0	1612
K09240	KEQ62702.1	KAH0374863.1	94.817	849	40	2	54	898	1	849	0	1597
K09240	KEQ62702.1	KAH0163021.1	94.817	849	40	2	54	898	1	849	0	1597
K09240	KEQ62702.1	KAH0116589.1	94.817	849	40	2	54	898	1	849	0	1597
K09240	KEQ62702.1	KAH0058299.1	94.817	849	40	2	54	898	1	849	0	1597
K09240	KEQ62702.1	KAG9869537.1	94.817	849	40	2	54	898	1	849	0	1597
K09240	KEQ62702.1	KAG9647026.1	94.817	849	40	2	54	898	1	849	0	1597
K09240	KEQ62702.1	KAG9602472.1	94.817	849	40	2	54	898	1	849	0	1597
K09240	KEQ62702.1	KER00707.1	87.154	903	107	7	1	898	1	899	0	1592
K09240	KEQ62702.1	KAH0286643.1	86.309	913	104	7	1	898	1	907	0	1575
K09240	KEQ62702.1	KEQ71613.1	86.309	913	104	7	1	898	1	907	0	1575
K09240	KEQ62702.1	CAD0109084.1	86.329	929	63	8	7	896	1	904	0	1568
K09240	KEQ62702.1	CAD0089029.1	82.942	938	86	8	1	898	1	904	0	1530
K09240	KEQ62702.1	KAG9820546.1	96.997	766	20	1	1	763	1	766	0	1526
K09240	KEQ62702.1	KAG9866320.1	95.541	740	29	2	163	898	1	740	0	1460
K09240	KEQ62702.1	KAG9599352.1	94.922	768	35	2	135	898	1	768	0	1442
K09240	KEQ62702.1	KAG9889751.1	96.875	704	19	1	1	701	1	704	0	1402

## Sheet: Cbf1
KEGG Orthology (KO)	Reference	subject acc.ver	% identity	alignment length	mismatches	gap opens	q. start	q. end	s. start	s. end	evalue	bit score
K22484	KEQ65045.1	KAH0341118.1	100	148	0	0	1	148	169	316	7.99e-106	308
K22484	KEQ65045.1	KAH0306235.1	100	148	0	0	1	148	169	316	7.99e-106	308
K22484	KEQ65045.1	KAH0260981.1	100	148	0	0	1	148	169	316	7.99e-106	308
K22484	KEQ65045.1	KAG9947999.1	100	148	0	0	1	148	169	316	7.99e-106	308
K22484	KEQ65045.1	KAG9798896.1	100	148	0	0	1	148	169	316	7.99e-106	308
K22484	KEQ65045.1	KAG9675863.1	100	148	0	0	1	148	169	316	7.99e-106	308
K22484	KEQ65045.1	KAH0372824.1	99.324	148	1	0	1	148	170	317	3.17e-105	307
K22484	KEQ65045.1	KAG9556188.1	98.649	148	2	0	1	148	68	215	1.21e-104	301
K22484	KEQ65045.1	KAH0409124.1	98.649	148	2	0	1	148	170	317	1.51e-104	305
K22484	KEQ65045.1	KAH0068995.1	98.649	148	2	0	1	148	170	317	1.51e-104	305
K22484	KEQ65045.1	KAH0001630.1	98.649	148	2	0	1	148	170	317	1.58e-104	305
K22484	KEQ65045.1	KAG9651154.1	98.649	148	2	0	1	148	170	317	1.6e-104	305
K22484	KEQ65045.1	KAG9821351.1	98.649	148	2	0	1	148	170	317	1.65e-104	305
K22484	KEQ65045.1	KAH0306372.1	98.649	148	2	0	1	148	170	317	1.71e-104	305
K22484	KEQ65045.1	KAG9967463.1	98.649	148	2	0	1	148	170	317	1.71e-104	305
K22484	KEQ65045.1	KAG9889147.1	98.649	148	2	0	1	148	170	317	1.71e-104	305
K22484	KEQ65045.1	KAG9900322.1	98.649	148	2	0	1	148	170	317	1.71e-104	305
K22484	KEQ65045.1	KAG9824083.1	98.649	148	2	0	1	148	170	317	1.71e-104	305
K22484	KEQ65045.1	KAG9769829.1	98.649	148	2	0	1	148	170	317	1.71e-104	305
K22484	KEQ65045.1	KAG9676121.1	98.649	148	2	0	1	148	170	317	1.71e-104	305
K22484	KEQ65045.1	KAH0291622.1	98.649	148	2	0	1	148	170	317	1.84e-104	305
K22484	KEQ65045.1	KAH0090959.1	98.649	148	2	0	1	148	170	317	1.84e-104	305
K22484	KEQ65045.1	KAH0077195.1	98.649	148	2	0	1	148	170	317	1.84e-104	305
K22484	KEQ65045.1	KAG9551662.1	98.649	148	2	0	1	148	170	317	1.84e-104	305
K22484	KEQ65045.1	KAG9550663.1	98.649	148	2	0	1	148	170	317	1.84e-104	305
K22484	KEQ65045.1	KAG9880888.1	98.649	148	2	0	1	148	170	317	1.97e-104	305
K22484	KEQ65045.1	KAH0155818.1	98.649	148	2	0	1	148	170	317	2.01e-104	305
K22484	KEQ65045.1	KAG9610554.1	98.649	148	2	0	1	148	170	317	2.01e-104	305
K22484	KEQ65045.1	KAH0138448.1	98.649	148	2	0	1	148	170	317	2.15e-104	305
K22484	KEQ65045.1	KAG9818620.1	98.649	148	2	0	1	148	170	317	2.15e-104	305
K22484	KEQ65045.1	KAH0308571.1	98.649	148	2	0	1	148	170	317	2.37e-104	305
K22484	KEQ65045.1	KAH0235213.1	98.649	148	2	0	1	148	170	317	2.37e-104	305
K22484	KEQ65045.1	KAH0227986.1	98.649	148	2	0	1	148	170	317	2.37e-104	305
K22484	KEQ65045.1	KAH0248307.1	98.649	148	2	0	1	148	170	317	2.37e-104	305
K22484	KEQ65045.1	KAH0170639.1	98.649	148	2	0	1	148	170	317	2.37e-104	305
K22484	KEQ65045.1	KAH0191953.1	98.649	148	2	0	1	148	170	317	2.37e-104	305
K22484	KEQ65045.1	KAH0202642.1	98.649	148	2	0	1	148	170	317	2.37e-104	305
K22484	KEQ65045.1	KAH0005327.1	98.649	148	2	0	1	148	170	317	2.37e-104	305
K22484	KEQ65045.1	KAG9677819.1	98.649	148	2	0	1	148	170	317	2.37e-104	305
K22484	KEQ65045.1	KAG9561581.1	98.649	148	2	0	1	148	170	317	2.37e-104	305
K22484	KEQ65045.1	KAG9520937.1	98.649	148	2	0	1	148	170	317	2.37e-104	305
K22484	KEQ65045.1	KAH0007340.1	98.649	148	2	0	1	148	170	317	2.4e-104	305
K22484	KEQ65045.1	KAG9967433.1	98.649	148	2	0	1	148	170	317	2.4e-104	305
K22484	KEQ65045.1	KAG9889129.1	98.649	148	2	0	1	148	170	317	2.4e-104	305
K22484	KEQ65045.1	KAG9900264.1	98.649	148	2	0	1	148	170	317	2.4e-104	305
K22484	KEQ65045.1	KAG9824050.1	98.649	148	2	0	1	148	170	317	2.4e-104	305
K22484	KEQ65045.1	KAG9715719.1	98.649	148	2	0	1	148	170	317	2.4e-104	305
K22484	KEQ65045.1	KAH0018253.1	98.649	148	2	0	1	148	170	317	2.48e-104	305
K22484	KEQ65045.1	KAH0348159.1	98.649	148	2	0	1	148	170	317	2.59e-104	305
K22484	KEQ65045.1	KAH0260977.1	98.649	148	2	0	1	148	170	317	2.59e-104	305
K22484	KEQ65045.1	KAH0291031.1	98.649	148	2	0	1	148	170	317	2.59e-104	305
K22484	KEQ65045.1	KAG9964661.1	98.649	148	2	0	1	148	170	317	2.59e-104	305
K22484	KEQ65045.1	KAG9734908.1	98.649	148	2	0	1	148	170	317	2.59e-104	305
K22484	KEQ65045.1	KAG9654403.1	98.649	148	2	0	1	148	170	317	2.59e-104	305
K22484	KEQ65045.1	KAG9647348.1	98.649	148	2	0	1	148	170	317	2.59e-104	305
K22484	KEQ65045.1	KAH0400474.1	98.649	148	2	0	1	148	170	317	2.65e-104	305
K22484	KEQ65045.1	KAH0385737.1	98.649	148	2	0	1	148	170	317	2.65e-104	305
K22484	KEQ65045.1	KAG9755344.1	98.649	148	2	0	1	148	170	317	2.65e-104	305
K22484	KEQ65045.1	KAG9532519.1	98.649	148	2	0	1	148	170	317	2.65e-104	305
K22484	KEQ65045.1	THY52356.1	95.946	148	6	0	1	148	174	321	4.82e-102	299
K22484	KEQ65045.1	THZ67330.1	95.946	148	6	0	1	148	176	323	6.47e-102	298
K22484	KEQ65045.1	KAG2170115.1	95.946	148	6	0	1	148	171	318	6.99e-102	298
K22484	KEQ65045.1	TIA44307.1	95.946	148	6	0	1	148	171	318	6.99e-102	298
K22484	KEQ65045.1	THZ90989.1	95.946	148	6	0	1	148	171	318	6.99e-102	298
K22484	KEQ65045.1	TIA13555.1	95.946	148	6	0	1	148	171	318	6.99e-102	298
K22484	KEQ65045.1	THZ94347.1	95.946	148	6	0	1	148	171	318	6.99e-102	298
K22484	KEQ65045.1	THZ76197.1	95.946	148	6	0	1	148	171	318	6.99e-102	298
K22484	KEQ65045.1	THZ69067.1	95.946	148	6	0	1	148	171	318	6.99e-102	298
K22484	KEQ65045.1	TIA36303.1	95.946	148	6	0	1	148	171	318	6.99e-102	298
K22484	KEQ65045.1	THZ45063.1	95.946	148	6	0	1	148	171	318	6.99e-102	298
K22484	KEQ65045.1	THY88560.1	95.946	148	6	0	1	148	171	318	6.99e-102	298
K22484	KEQ65045.1	THZ30834.1	95.946	148	6	0	1	148	171	318	6.99e-102	298
K22484	KEQ65045.1	THZ39290.1	95.946	148	6	0	1	148	171	318	6.99e-102	298
K22484	KEQ65045.1	THY92327.1	95.946	148	6	0	1	148	171	318	6.99e-102	298
K22484	KEQ65045.1	THY16109.1	95.946	148	6	0	1	148	171	318	6.99e-102	298
K22484	KEQ65045.1	THX53762.1	95.946	148	6	0	1	148	171	318	6.99e-102	298
K22484	KEQ65045.1	THY77609.1	95.946	148	6	0	1	148	171	318	6.99e-102	298
K22484	KEQ65045.1	THY51969.1	95.946	148	6	0	1	148	171	318	6.99e-102	298
K22484	KEQ65045.1	THY09831.1	95.946	148	6	0	1	148	171	318	6.99e-102	298
K22484	KEQ65045.1	THX82173.1	95.946	148	6	0	1	148	171	318	6.99e-102	298
K22484	KEQ65045.1	THW49916.1	95.946	148	6	0	1	148	171	318	6.99e-102	298
K22484	KEQ65045.1	THW00422.1	95.946	148	6	0	1	148	171	318	6.99e-102	298
K22484	KEQ65045.1	THV93859.1	95.946	148	6	0	1	148	171	318	6.99e-102	298
K22484	KEQ65045.1	THV79576.1	95.946	148	6	0	1	148	171	318	6.99e-102	298
K22484	KEQ65045.1	THW13557.1	95.946	148	6	0	1	148	171	318	6.99e-102	298
K22484	KEQ65045.1	TIA67583.1	95.946	148	6	0	1	148	171	318	7.22e-102	298
K22484	KEQ65045.1	TIA53350.1	95.946	148	6	0	1	148	171	318	7.22e-102	298
K22484	KEQ65045.1	THX60719.1	95.946	148	6	0	1	148	171	318	7.22e-102	298
K22484	KEQ65045.1	THW94322.1	95.946	148	6	0	1	148	171	318	7.22e-102	298
K22484	KEQ65045.1	THY21816.1	95.946	148	6	0	1	148	171	318	7.22e-102	298
K22484	KEQ65045.1	THX91595.1	95.946	148	6	0	1	148	171	318	7.22e-102	298
K22484	KEQ65045.1	THX42042.1	95.946	148	6	0	1	148	171	318	7.22e-102	298
K22484	KEQ65045.1	THX23955.1	95.946	148	6	0	1	148	171	318	7.22e-102	298
K22484	KEQ65045.1	THX17269.1	95.946	148	6	0	1	148	171	318	7.22e-102	298
K22484	KEQ65045.1	THW93109.1	95.946	148	6	0	1	148	171	318	7.22e-102	298
K22484	KEQ65045.1	THW90408.1	95.946	148	6	0	1	148	171	318	7.22e-102	298
K22484	KEQ65045.1	THW36317.1	95.946	148	6	0	1	148	171	318	7.22e-102	298
K22484	KEQ65045.1	THW70800.1	95.946	148	6	0	1	148	171	318	7.22e-102	298
K22484	KEQ65045.1	THV65621.1	95.946	148	6	0	1	148	171	318	7.22e-102	298
K22484	KEQ65045.1	THY29642.1	95.946	148	6	0	1	148	171	318	7.63e-102	298
K22484	KEQ65045.1	THW71667.1	95.946	148	6	0	1	148	171	318	7.63e-102	298
K22484	KEQ65045.1	THY42918.1	95.946	148	6	0	1	148	171	318	8.06e-102	298
K22484	KEQ65045.1	THZ23328.1	95.946	148	6	0	1	148	171	318	8.7e-102	298
K22484	KEQ65045.1	THZ01430.1	95.946	148	6	0	1	148	171	318	1.18e-101	298
K22484	KEQ65045.1	TIA20999.1	95.946	148	6	0	1	148	171	318	1.22e-101	298
K22484	KEQ65045.1	THX71149.1	95.27	148	7	0	1	148	171	318	2.8e-101	297
K22484	KEQ65045.1	THW67520.1	95.27	148	7	0	1	148	171	318	2.96e-101	297
K22484	KEQ65045.1	THW26673.1	95.27	148	7	0	1	148	171	318	2.96e-101	297
K22484	KEQ65045.1	OBW63705.1	95.27	148	7	0	1	148	171	318	4.79e-101	296
K22484	KEQ65045.1	CAD0092935.1	94.595	148	8	0	1	148	160	307	1.27e-99	292
K22484	KEQ65045.1	CAD0091843.1	84.118	170	5	1	1	148	170	339	4.06e-97	287
K22484	KEQ65045.1	CAC9886024.1	84.94	166	7	1	1	148	171	336	4.45e-96	284
K22484	KEQ65045.1	CAD0044531.1	84.94	166	7	1	1	148	171	336	4.76e-96	284
K22484	KEQ65045.1	CAD0011910.1	84.94	166	7	1	1	148	171	336	4.76e-96	284
K22484	KEQ65045.1	CAD0113098.1	91.216	148	13	0	1	148	168	315	1.11e-95	284
K22484	KEQ65045.1	KAH0286411.1	91.216	148	13	0	1	148	168	315	4.15e-95	281
K22484	KEQ65045.1	KEQ99181.1	89.796	147	15	0	1	147	168	314	7.09e-95	280
K22484	KEQ65045.1	KEQ79492.1	98.413	126	2	0	5	130	2	127	1.71e-87	255
K22484	KEQ65045.1	KEQ68602.1	93.701	127	8	0	4	130	2	128	2.33e-83	244
K22484	KEQ65045.1	CAD0058016.1	83.217	143	5	1	1	143	171	294	3.31e-79	243
K22484	KEQ65045.1	CAD0025136.1	83.217	143	5	1	1	143	171	294	3.57e-79	243
K22484	KEQ65045.1	KAH0150782.1	99.123	114	1	0	35	148	3	116	3.77e-77	228

## Sheet: Cmr1
KEGG Orthology (KO)	Reference	subject acc.ver	% identity	alignment length	mismatches	gap opens	q. start	q. end	s. start	s. end	evalue	bit score
no KO assigned	KEQ67497.1	KAH0357127.1	100	967	0	0	1	967	1	967	0	2028
no KO assigned	KEQ67497.1	KAH0307312.1	99.586	967	4	0	1	967	1	967	0	2024
no KO assigned	KEQ67497.1	KAG9771689.1	99.586	967	4	0	1	967	1	967	0	2024
no KO assigned	KEQ67497.1	KAG9670900.1	99.586	967	4	0	1	967	1	967	0	2024
no KO assigned	KEQ67497.1	KAG9942931.1	99.483	967	5	0	1	967	1	967	0	2017
no KO assigned	KEQ67497.1	KAG9766973.1	99.173	967	8	0	1	967	1	967	0	2014
no KO assigned	KEQ67497.1	KAH0160555.1	98.966	967	10	0	1	967	1	967	0	2010
no KO assigned	KEQ67497.1	KAH0048032.1	98.862	967	11	0	1	967	1	967	0	2010
no KO assigned	KEQ67497.1	KAG9846606.1	98.759	967	12	0	1	967	1	967	0	2010
no KO assigned	KEQ67497.1	KAG9593111.1	98.862	967	11	0	1	967	1	967	0	2010
no KO assigned	KEQ67497.1	KAH0258086.1	98.759	967	12	0	1	967	1	967	0	2009
no KO assigned	KEQ67497.1	KAG9858479.1	98.759	967	12	0	1	967	1	967	0	2009
no KO assigned	KEQ67497.1	KAG9554385.1	98.759	967	12	0	1	967	1	967	0	2009
no KO assigned	KEQ67497.1	KAH0097678.1	98.759	967	12	0	1	967	1	967	0	2008
no KO assigned	KEQ67497.1	KAH0093310.1	98.759	967	12	0	1	967	1	967	0	2008
no KO assigned	KEQ67497.1	KAG9749233.1	98.759	967	12	0	1	967	1	967	0	2008
no KO assigned	KEQ67497.1	KAH0114243.1	98.656	967	13	0	1	967	1	967	0	2007
no KO assigned	KEQ67497.1	KAH0356380.1	98.656	967	13	0	1	967	1	967	0	2007
no KO assigned	KEQ67497.1	KAH0034724.1	98.656	967	13	0	1	967	1	967	0	2007
no KO assigned	KEQ67497.1	KAG9929718.1	98.656	967	13	0	1	967	1	967	0	2007
no KO assigned	KEQ67497.1	KAH0417295.1	98.552	967	14	0	1	967	1	967	0	2006
no KO assigned	KEQ67497.1	KAH0306399.1	98.552	967	14	0	1	967	1	967	0	2006
no KO assigned	KEQ67497.1	KAG9767873.1	98.552	967	14	0	1	967	1	967	0	2006
no KO assigned	KEQ67497.1	KAG9683785.1	98.552	967	14	0	1	967	1	967	0	2006
no KO assigned	KEQ67497.1	KAG9519214.1	98.552	967	14	0	1	967	1	967	0	2006
no KO assigned	KEQ67497.1	KAG9858829.1	98.449	967	15	0	1	967	1	967	0	2005
no KO assigned	KEQ67497.1	KAH0368632.1	98.552	967	14	0	1	967	1	967	0	2004
no KO assigned	KEQ67497.1	KAH0297169.1	98.552	967	14	0	1	967	1	967	0	2003
no KO assigned	KEQ67497.1	KAH0388504.1	98.345	967	16	0	1	967	1	967	0	2002
no KO assigned	KEQ67497.1	KAG9764534.1	98.345	967	16	0	1	967	1	967	0	2001
no KO assigned	KEQ67497.1	KAH0233166.1	98.345	967	16	0	1	967	1	967	0	1999
no KO assigned	KEQ67497.1	KAH0225251.1	98.345	967	16	0	1	967	1	967	0	1999
no KO assigned	KEQ67497.1	KAH0246702.1	98.345	967	16	0	1	967	1	967	0	1999
no KO assigned	KEQ67497.1	KAH0190522.1	98.345	967	16	0	1	967	1	967	0	1999
no KO assigned	KEQ67497.1	KAH0203347.1	98.345	967	16	0	1	967	1	967	0	1999
no KO assigned	KEQ67497.1	KAG9675740.1	98.345	967	16	0	1	967	1	967	0	1999
no KO assigned	KEQ67497.1	KAG9532829.1	98.242	967	17	0	1	967	1	967	0	1999
no KO assigned	KEQ67497.1	CAD0085771.1	95.233	986	28	2	1	967	1	986	0	1964
no KO assigned	KEQ67497.1	KAG9967144.1	97.602	959	22	1	10	967	84	1042	0	1964
no KO assigned	KEQ67497.1	CAD0082192.1	94.929	986	30	3	1	967	1	985	0	1958
no KO assigned	KEQ67497.1	KAH0283706.1	95.14	967	47	0	1	967	1	967	0	1926
no KO assigned	KEQ67497.1	KEQ77291.1	95.14	967	47	0	1	967	1	967	0	1926
no KO assigned	KEQ67497.1	THY26910.1	93.388	968	63	1	1	967	1	968	0	1892
no KO assigned	KEQ67497.1	THY93379.1	93.285	968	64	1	1	967	1	968	0	1890
no KO assigned	KEQ67497.1	TIA44052.1	93.285	968	64	1	1	967	1	968	0	1889
no KO assigned	KEQ67497.1	THZ66103.1	93.285	968	64	1	1	967	1	968	0	1889
no KO assigned	KEQ67497.1	THZ91479.1	93.285	968	64	1	1	967	1	968	0	1889
no KO assigned	KEQ67497.1	THZ69786.1	93.285	968	64	1	1	967	1	968	0	1889
no KO assigned	KEQ67497.1	TIA37638.1	93.285	968	64	1	1	967	1	968	0	1889
no KO assigned	KEQ67497.1	THZ42499.1	93.285	968	64	1	1	967	1	968	0	1889
no KO assigned	KEQ67497.1	THY74423.1	93.285	968	64	1	1	967	1	968	0	1889
no KO assigned	KEQ67497.1	THY52227.1	93.285	968	64	1	1	967	1	968	0	1889
no KO assigned	KEQ67497.1	THX76726.1	93.285	968	64	1	1	967	1	968	0	1889
no KO assigned	KEQ67497.1	THW88059.1	93.285	968	64	1	1	967	1	968	0	1889
no KO assigned	KEQ67497.1	THW03178.1	93.285	968	64	1	1	967	1	968	0	1889
no KO assigned	KEQ67497.1	THW59967.1	93.285	968	64	1	1	967	1	968	0	1889
no KO assigned	KEQ67497.1	THV97164.1	93.182	968	65	1	1	967	1	968	0	1888
no KO assigned	KEQ67497.1	CAC9891001.1	93.182	968	65	1	1	967	1	968	0	1887
no KO assigned	KEQ67497.1	THZ97144.1	93.182	968	65	1	1	967	1	968	0	1887
no KO assigned	KEQ67497.1	THZ28120.1	93.182	968	65	1	1	967	1	968	0	1887
no KO assigned	KEQ67497.1	THZ22883.1	93.182	968	65	1	1	967	1	968	0	1887
no KO assigned	KEQ67497.1	THY08330.1	93.182	968	65	1	1	967	1	968	0	1887
no KO assigned	KEQ67497.1	THY57439.1	93.182	968	65	1	1	967	1	968	0	1887
no KO assigned	KEQ67497.1	THX99172.1	93.182	968	65	1	1	967	1	968	0	1887
no KO assigned	KEQ67497.1	THX88880.1	93.182	968	65	1	1	967	1	968	0	1887
no KO assigned	KEQ67497.1	THW91137.1	93.182	968	65	1	1	967	1	968	0	1887
no KO assigned	KEQ67497.1	THW55150.1	93.182	968	65	1	1	967	1	968	0	1887
no KO assigned	KEQ67497.1	THW48145.1	93.182	968	65	1	1	967	1	968	0	1887
no KO assigned	KEQ67497.1	THW15888.1	93.182	968	65	1	1	967	1	968	0	1887
no KO assigned	KEQ67497.1	THV82957.1	93.182	968	65	1	1	967	1	968	0	1887
no KO assigned	KEQ67497.1	THW14745.1	93.182	968	65	1	1	967	1	968	0	1887
no KO assigned	KEQ67497.1	TIA77273.1	93.182	968	65	1	1	967	1	968	0	1887
no KO assigned	KEQ67497.1	TIA51845.1	93.182	968	65	1	1	967	1	968	0	1887
no KO assigned	KEQ67497.1	THZ06905.1	93.182	968	65	1	1	967	1	968	0	1887
no KO assigned	KEQ67497.1	THX18354.1	93.182	968	65	1	1	967	1	968	0	1887
no KO assigned	KEQ67497.1	THW35616.1	93.182	968	65	1	1	967	1	968	0	1887
no KO assigned	KEQ67497.1	THX62404.1	93.182	968	65	1	1	967	1	968	0	1886
no KO assigned	KEQ67497.1	THX33577.1	93.182	968	65	1	1	967	1	968	0	1886
no KO assigned	KEQ67497.1	THW58464.1	92.975	968	67	1	1	967	1	968	0	1886
no KO assigned	KEQ67497.1	TIA24664.1	93.079	968	66	1	1	967	1	968	0	1884
no KO assigned	KEQ67497.1	THZ81236.1	93.079	968	66	1	1	967	1	968	0	1884
no KO assigned	KEQ67497.1	THZ51487.1	93.079	968	66	1	1	967	1	968	0	1884
no KO assigned	KEQ67497.1	THY51863.1	93.079	968	66	1	1	967	1	968	0	1884
no KO assigned	KEQ67497.1	KEQ82753.1	92.975	968	67	1	1	967	1	968	0	1884
no KO assigned	KEQ67497.1	KAG2167016.1	92.975	968	67	1	1	967	1	968	0	1883
no KO assigned	KEQ67497.1	THX33880.1	92.872	968	68	1	1	967	1	968	0	1883
no KO assigned	KEQ67497.1	THV69354.1	92.975	968	67	1	1	967	1	968	0	1883
no KO assigned	KEQ67497.1	KEQ93570.1	91.632	968	80	1	1	967	1	968	0	1882
no KO assigned	KEQ67497.1	THX74524.1	92.872	968	68	1	1	967	1	968	0	1880
no KO assigned	KEQ67497.1	THY24126.1	92.665	968	70	1	1	967	1	968	0	1877
no KO assigned	KEQ67497.1	CAD0039696.1	92.776	969	68	2	1	967	1	969	0	1875
no KO assigned	KEQ67497.1	CAD0037917.1	92.665	968	70	1	1	967	1	968	0	1874
no KO assigned	KEQ67497.1	CAD0106537.1	95.936	935	37	1	33	967	68	1001	0	1872
no KO assigned	KEQ67497.1	THX59196.1	92.776	969	68	1	1	967	1	969	0	1868
no KO assigned	KEQ67497.1	TIA25469.1	90.964	985	66	3	1	967	1	980	0	1858
no KO assigned	KEQ67497.1	THZ04057.1	90.863	985	67	3	1	967	1	980	0	1855
no KO assigned	KEQ67497.1	THX05895.1	90.66	985	69	3	1	967	1	980	0	1851
no KO assigned	KEQ67497.1	CAD0022145.1	91.322	968	63	2	1	967	1	948	0	1838
no KO assigned	KEQ67497.1	TIA58713.1	93.107	943	64	1	1	942	1	943	0	1837
no KO assigned	KEQ67497.1	KAH0278278.1	99.437	711	4	0	1	711	1	711	0	1488
no KO assigned	KEQ67497.1	KAG9628530.1	98.842	691	8	0	277	967	1	691	0	1429
no KO assigned	KEQ67497.1	KAH0176388.1	98.82	678	8	0	290	967	1	678	0	1403
no KO assigned	KEQ67497.1	CAD0010926.1	92.868	673	47	1	1	672	1	673	0	1322
no KO assigned	KEQ67497.1	KAH0404212.1	98.415	568	9	0	1	568	1	568	0	1179
no KO assigned	KEQ67497.1	KAH0172603.1	98.521	541	8	0	1	541	1	541	0	1125
no KO assigned	KEQ67497.1	KAG9537865.1	98.681	455	6	0	1	455	1	455	0	950
no KO assigned	KEQ67497.1	KAG9621322.1	98.202	445	8	0	1	445	1	445	0	927
no KO assigned	KEQ67497.1	KAG9621330.1	97.978	445	9	0	1	445	1	445	0	926
no KO assigned	KEQ67497.1	KAH0404841.1	98.856	437	5	0	531	967	1	437	0	906
no KO assigned	KEQ67497.1	KAH0262666.1	98.621	435	6	0	290	724	1	435	0	896
no KO assigned	KEQ67497.1	KAG9628391.1	98.621	435	6	0	290	724	1	435	0	896
no KO assigned	KEQ67497.1	KAG9547168.1	98.621	435	6	0	290	724	1	435	0	896
no KO assigned	KEQ67497.1	KAH0262655.1	98.465	391	6	0	334	724	1	391	0	806
no KO assigned	KEQ67497.1	KAG9628405.1	98.465	391	6	0	334	724	1	391	0	806
no KO assigned	KEQ67497.1	KAG9547160.1	98.465	391	6	0	334	724	1	391	0	806
no KO assigned	KEQ67497.1	KAG9619757.1	98.972	389	4	0	407	795	1	389	0	802
no KO assigned	KEQ67497.1	KAH0140820.1	99.189	370	3	0	503	872	1	370	0	769
no KO assigned	KEQ67497.1	KAG9619422.1	99.183	367	3	0	429	795	1	367	0	759
no KO assigned	KEQ67497.1	KAG9933038.1	99.415	342	2	0	626	967	1	342	0	714
no KO assigned	KEQ67497.1	KAG9933039.1	99.123	342	3	0	626	967	1	342	0	712
no KO assigned	KEQ67497.1	KAG9881067.1	99.123	342	3	0	626	967	1	342	0	712
no KO assigned	KEQ67497.1	KAG9883284.1	98.83	342	4	0	626	967	1	342	0	712
no KO assigned	KEQ67497.1	KAH0141441.1	97.406	347	9	0	195	541	1	347	0	711
no KO assigned	KEQ67497.1	KAH0256816.1	98.489	331	5	0	1	331	1	331	0	694
no KO assigned	KEQ67497.1	KAH0252197.1	99.7	333	1	0	426	758	1	333	0	691
no KO assigned	KEQ67497.1	KAG9645822.1	99.083	327	3	0	1	327	1	327	0	689
no KO assigned	KEQ67497.1	KAH0389856.1	98.171	328	6	0	241	568	1	328	0	672
no KO assigned	KEQ67497.1	KAG9583346.1	99.645	282	1	0	686	967	1	282	0	589
no KO assigned	KEQ67497.1	KAG9666319.1	99.291	282	2	0	686	967	1	282	0	588
no KO assigned	KEQ67497.1	KAH0269930.1	99.27	274	2	0	694	967	1	274	0	572
no KO assigned	KEQ67497.1	KAH0254131.1	99.588	243	1	0	725	967	1	243	5.46e-174	509
no KO assigned	KEQ67497.1	KAH0250871.1	97.788	226	5	0	91	316	1	226	8.29e-157	464
no KO assigned	KEQ67497.1	KAH0138441.1	97.788	226	5	0	91	316	1	226	8.29e-157	464
no KO assigned	KEQ67497.1	KAG9575639.1	97.788	226	5	0	91	316	1	226	8.29e-157	464
no KO assigned	KEQ67497.1	KAG9875845.1	99.07	215	2	0	1	215	1	215	2.81e-153	455
no KO assigned	KEQ67497.1	KAH0113470.1	99.492	197	1	0	771	967	1	197	3.19e-137	413
no KO assigned	KEQ67497.1	KAG9976815.1	99.492	197	1	0	771	967	1	197	3.19e-137	413
no KO assigned	KEQ67497.1	KAG9879833.1	99.492	197	1	0	771	967	1	197	3.19e-137	413
no KO assigned	KEQ67497.1	KAH0283756.1	98.985	197	2	0	771	967	1	197	6.06e-137	412
no KO assigned	KEQ67497.1	KAG9723241.1	98.985	197	2	0	771	967	1	197	6.06e-137	412
no KO assigned	KEQ67497.1	KAG9976824.1	98.477	197	3	0	771	967	1	197	5.67e-136	409
no KO assigned	KEQ67497.1	KAH0250865.1	98.477	197	3	0	120	316	1	197	5.94e-134	404
no KO assigned	KEQ67497.1	KAH0138404.1	98.477	197	3	0	120	316	1	197	5.94e-134	404
no KO assigned	KEQ67497.1	KAG9575629.1	98.477	197	3	0	120	316	1	197	5.94e-134	404
no KO assigned	KEQ67497.1	KAG9544718.1	97.872	188	4	0	780	967	1	188	3.44e-128	389
no KO assigned	KEQ67497.1	KAG9956674.1	99.462	186	1	0	614	799	1	186	1.38e-127	387
no KO assigned	KEQ67497.1	KAG9530340.1	97.849	186	4	0	91	276	1	186	7.52e-127	385
no KO assigned	KEQ67497.1	KAG9878602.1	100	173	0	0	795	967	1	173	8.96e-119	364
no KO assigned	KEQ67497.1	KAG9530346.1	98.726	157	2	0	120	276	1	157	1.59e-104	326

## Sheet: Crz1
KEGG Orthology (KO)	Reference	subject acc.ver	% identity	alignment length	mismatches	gap opens	q. start	q. end	s. start	s. end	evalue	bit score
K21543	KEQ62890.1	KAH0350104.1	100	714	0	0	1	714	1	714	0	1447
K21543	KEQ62890.1	KAH0313444.1	99.86	714	1	0	1	714	1	714	0	1444
K21543	KEQ62890.1	KAG9769700.1	99.86	714	1	0	1	714	1	714	0	1444
K21543	KEQ62890.1	KAG9682984.1	99.86	714	1	0	1	714	1	714	0	1444
K21543	KEQ62890.1	KAG9954054.1	99.58	714	3	0	1	714	1	714	0	1439
K21543	KEQ62890.1	KAH0366256.1	98.599	714	10	0	1	714	1	714	0	1424
K21543	KEQ62890.1	KAH0418103.1	97.899	714	15	0	1	714	1	714	0	1414
K21543	KEQ62890.1	KAG9897656.1	97.899	714	15	0	1	714	1	714	0	1414
K21543	KEQ62890.1	KAG9590678.1	97.899	714	15	0	1	714	1	714	0	1414
K21543	KEQ62890.1	KAH0163929.1	97.479	714	18	0	1	714	1	714	0	1411
K21543	KEQ62890.1	KAG9895344.1	97.619	714	17	0	1	714	1	714	0	1411
K21543	KEQ62890.1	KAG9759287.1	97.479	714	18	0	1	714	1	714	0	1411
K21543	KEQ62890.1	KAG9515331.1	97.479	714	18	0	1	714	1	714	0	1411
K21543	KEQ62890.1	KAH0260106.1	97.479	714	18	0	1	714	1	714	0	1408
K21543	KEQ62890.1	KAH0385145.1	97.479	714	18	0	1	714	1	714	0	1405
K21543	KEQ62890.1	KAH0236375.1	97.479	714	18	0	1	714	1	714	0	1405
K21543	KEQ62890.1	KAH0219077.1	97.479	714	18	0	1	714	1	714	0	1405
K21543	KEQ62890.1	KAH0248874.1	97.479	714	18	0	1	714	1	714	0	1405
K21543	KEQ62890.1	KAH0192710.1	97.479	714	18	0	1	714	1	714	0	1405
K21543	KEQ62890.1	KAH0205572.1	97.479	714	18	0	1	714	1	714	0	1405
K21543	KEQ62890.1	KAG9677278.1	97.479	714	18	0	1	714	1	714	0	1405
K21543	KEQ62890.1	KAH0402886.1	97.339	714	19	0	1	714	1	714	0	1404
K21543	KEQ62890.1	KAG9965322.1	97.199	714	20	0	1	714	1	714	0	1403
K21543	KEQ62890.1	CAD0088729.1	96.919	714	21	1	1	714	1	713	0	1400
K21543	KEQ62890.1	KAH0256954.1	99.855	688	1	0	27	714	1	688	0	1395
K21543	KEQ62890.1	KAH0312982.1	93.557	714	25	1	1	714	1	693	0	1335
K21543	KEQ62890.1	KAG9769412.1	93.557	714	25	1	1	714	1	693	0	1335
K21543	KEQ62890.1	KAG9675852.1	93.557	714	25	1	1	714	1	693	0	1335
K21543	KEQ62890.1	KAG9940869.1	98.168	655	12	0	1	655	1	655	0	1297
K21543	KEQ62890.1	THZ80603.1	92.5	720	47	3	1	714	1	719	0	1280
K21543	KEQ62890.1	THX01017.1	92.5	720	47	3	1	714	1	719	0	1280
K21543	KEQ62890.1	TIA50521.1	92.361	720	48	3	1	714	1	719	0	1278
K21543	KEQ62890.1	TIA44038.1	92.361	720	48	3	1	714	1	719	0	1278
K21543	KEQ62890.1	TIA84677.1	92.361	720	48	3	1	714	1	719	0	1278
K21543	KEQ62890.1	THZ63122.1	92.361	720	48	3	1	714	1	719	0	1278
K21543	KEQ62890.1	THZ86756.1	92.361	720	48	3	1	714	1	719	0	1278
K21543	KEQ62890.1	TIA56754.1	92.361	720	48	3	1	714	1	719	0	1278
K21543	KEQ62890.1	TIA05999.1	92.361	720	48	3	1	714	1	719	0	1278
K21543	KEQ62890.1	TIA04302.1	92.361	720	48	3	1	714	1	719	0	1278
K21543	KEQ62890.1	THZ78455.1	92.361	720	48	3	1	714	1	719	0	1278
K21543	KEQ62890.1	THZ44614.1	92.361	720	48	3	1	714	1	719	0	1278
K21543	KEQ62890.1	THY85165.1	92.361	720	48	3	1	714	1	719	0	1278
K21543	KEQ62890.1	THZ30737.1	92.361	720	48	3	1	714	1	719	0	1278
K21543	KEQ62890.1	THZ35270.1	92.361	720	48	3	1	714	1	719	0	1278
K21543	KEQ62890.1	THZ24815.1	92.361	720	48	3	1	714	1	719	0	1278
K21543	KEQ62890.1	THY86064.1	92.361	720	48	3	1	714	1	719	0	1278
K21543	KEQ62890.1	THY11974.1	92.361	720	48	3	1	714	1	719	0	1278
K21543	KEQ62890.1	THX64366.1	92.361	720	48	3	1	714	1	719	0	1278
K21543	KEQ62890.1	THX14916.1	92.361	720	48	3	1	714	1	719	0	1278
K21543	KEQ62890.1	THY75841.1	92.361	720	48	3	1	714	1	719	0	1278
K21543	KEQ62890.1	THY51073.1	92.361	720	48	3	1	714	1	719	0	1278
K21543	KEQ62890.1	THY40493.1	92.361	720	48	3	1	714	1	719	0	1278
K21543	KEQ62890.1	THY09401.1	92.361	720	48	3	1	714	1	719	0	1278
K21543	KEQ62890.1	THX88183.1	92.361	720	48	3	1	714	1	719	0	1278
K21543	KEQ62890.1	THX67070.1	92.361	720	48	3	1	714	1	719	0	1278
K21543	KEQ62890.1	THX44298.1	92.361	720	48	3	1	714	1	719	0	1278
K21543	KEQ62890.1	THX31907.1	92.361	720	48	3	1	714	1	719	0	1278
K21543	KEQ62890.1	THW83237.1	92.361	720	48	3	1	714	1	719	0	1278
K21543	KEQ62890.1	THW87976.1	92.361	720	48	3	1	714	1	719	0	1278
K21543	KEQ62890.1	THW68928.1	92.361	720	48	3	1	714	1	719	0	1278
K21543	KEQ62890.1	THW43686.1	92.361	720	48	3	1	714	1	719	0	1278
K21543	KEQ62890.1	THV99442.1	92.361	720	48	3	1	714	1	719	0	1278
K21543	KEQ62890.1	THW63560.1	92.361	720	48	3	1	714	1	719	0	1278
K21543	KEQ62890.1	THW31087.1	92.361	720	48	3	1	714	1	719	0	1278
K21543	KEQ62890.1	THW24918.1	92.361	720	48	3	1	714	1	719	0	1278
K21543	KEQ62890.1	THV99941.1	92.361	720	48	3	1	714	1	719	0	1278
K21543	KEQ62890.1	THV77864.1	92.361	720	48	3	1	714	1	719	0	1278
K21543	KEQ62890.1	THW11384.1	92.361	720	48	3	1	714	1	719	0	1278
K21543	KEQ62890.1	THW41980.1	92.361	720	48	3	1	714	1	719	0	1278
K21543	KEQ62890.1	THV77688.1	92.361	720	48	3	1	714	1	719	0	1278
K21543	KEQ62890.1	KEQ87890.1	92.361	720	48	3	1	714	1	719	0	1277
K21543	KEQ62890.1	TIA09100.1	92.361	720	48	3	1	714	1	719	0	1277
K21543	KEQ62890.1	THZ07930.1	92.361	720	48	3	1	714	1	719	0	1277
K21543	KEQ62890.1	THX53804.1	92.361	720	48	3	1	714	1	719	0	1277
K21543	KEQ62890.1	KAG9625309.1	98.142	646	12	0	1	646	1	646	0	1276
K21543	KEQ62890.1	TIA35370.1	92.222	720	49	3	1	714	1	719	0	1275
K21543	KEQ62890.1	KAG2162594.1	92.222	720	49	3	1	714	1	719	0	1274
K21543	KEQ62890.1	THY16193.1	92.222	720	49	3	1	714	1	719	0	1274
K21543	KEQ62890.1	THX67888.1	92.222	720	49	3	1	714	1	719	0	1274
K21543	KEQ62890.1	THY52584.1	92.083	720	50	3	1	714	1	719	0	1273
K21543	KEQ62890.1	THY15136.1	92.603	703	45	3	1	697	1	702	0	1246
K21543	KEQ62890.1	KER00309.1	90.784	727	54	5	1	714	1	727	0	1245
K21543	KEQ62890.1	KAH0294032.1	92.598	716	50	3	1	714	1	715	0	1241
K21543	KEQ62890.1	KEQ73511.1	92.598	716	50	3	1	714	1	715	0	1241
K21543	KEQ62890.1	CAC9893316.1	89.861	720	49	4	1	714	1	702	0	1231
K21543	KEQ62890.1	CAD0023544.1	89.583	720	48	4	1	714	1	699	0	1224
K21543	KEQ62890.1	CAD0056728.1	89.583	720	48	4	1	714	8	706	0	1223
K21543	KEQ62890.1	CAD0094620.1	86.32	731	53	4	2	714	3	704	0	1221
K21543	KEQ62890.1	CAD0108941.1	85.929	732	55	4	2	714	3	705	0	1219
K21543	KEQ62890.1	CAD0043947.1	89.32	721	49	5	1	714	1	700	0	1215
K21543	KEQ62890.1	KAH0075539.1	98.355	608	10	0	1	608	1	608	0	1204
K21543	KEQ62890.1	CAD0016960.1	89.32	721	49	5	1	714	1	700	0	1199

## Sheet: Ftr1
KEGG Orthology (KO)	Reference	subject acc.ver	% identity	alignment length	mismatches	gap opens	q. start	q. end	s. start	s. end	evalue	bit score
K07243	KEQ60767.1	KAH0336789.1	100	590	0	0	1	590	2	591	0	1239
K07243	KEQ60767.1	KAH0304307.1	100	590	0	0	1	590	2	591	0	1239
K07243	KEQ60767.1	KAH0276691.1	100	590	0	0	1	590	2	591	0	1239
K07243	KEQ60767.1	KAG9943901.1	100	590	0	0	1	590	2	591	0	1239
K07243	KEQ60767.1	KAG9767451.1	100	590	0	0	1	590	2	591	0	1239
K07243	KEQ60767.1	KAG9669744.1	100	590	0	0	1	590	2	591	0	1239
K07243	KEQ60767.1	KAH0360548.1	99.492	591	2	1	1	590	2	592	0	1227
K07243	KEQ60767.1	KAH0304177.1	98.985	591	5	1	1	590	15	605	0	1224
K07243	KEQ60767.1	KAG9941647.1	99.154	591	4	1	1	590	2	592	0	1224
K07243	KEQ60767.1	KAG9767467.1	98.985	591	5	1	1	590	2	592	0	1224
K07243	KEQ60767.1	KAG9669763.1	98.985	591	5	1	1	590	2	592	0	1224
K07243	KEQ60767.1	KAG9627488.1	98.985	591	5	1	1	590	2	592	0	1224
K07243	KEQ60767.1	KAG9888038.1	99.154	591	4	1	1	590	7	597	0	1223
K07243	KEQ60767.1	KAG9822490.1	99.154	591	4	1	1	590	7	597	0	1223
K07243	KEQ60767.1	KAG9737198.1	98.985	591	5	1	1	590	15	605	0	1223
K07243	KEQ60767.1	KAH0342522.1	98.985	591	5	1	1	590	2	592	0	1222
K07243	KEQ60767.1	KAH0306876.1	98.985	591	5	1	1	590	2	592	0	1222
K07243	KEQ60767.1	KAH0070334.1	98.985	591	5	1	1	590	2	592	0	1222
K07243	KEQ60767.1	KAG9957083.1	98.985	591	5	1	1	590	2	592	0	1222
K07243	KEQ60767.1	KAG9621411.1	98.985	591	5	1	1	590	2	592	0	1222
K07243	KEQ60767.1	KAG9627415.1	98.985	591	5	1	1	590	2	592	0	1222
K07243	KEQ60767.1	KAG9901131.1	98.985	591	5	1	1	590	2	592	0	1222
K07243	KEQ60767.1	KAH0227559.1	98.646	591	7	1	1	590	1	591	0	1220
K07243	KEQ60767.1	KAH0213988.1	98.646	591	7	1	1	590	1	591	0	1220
K07243	KEQ60767.1	KAH0241147.1	98.646	591	7	1	1	590	1	591	0	1220
K07243	KEQ60767.1	KAH0184808.1	98.646	591	7	1	1	590	1	591	0	1220
K07243	KEQ60767.1	KAH0197194.1	98.646	591	7	1	1	590	1	591	0	1220
K07243	KEQ60767.1	KAG9667653.1	98.646	591	7	1	1	590	1	591	0	1220
K07243	KEQ60767.1	KAG9512139.1	98.477	591	8	1	1	590	2	592	0	1219
K07243	KEQ60767.1	KAH0162158.1	98.477	591	8	1	1	590	1	591	0	1218
K07243	KEQ60767.1	KAH0401549.1	97.97	591	11	1	1	590	2	592	0	1213
K07243	KEQ60767.1	KAH0378156.1	97.97	591	11	1	1	590	2	592	0	1212
K07243	KEQ60767.1	CAD0090979.1	97.966	590	11	1	1	589	7	596	0	1212
K07243	KEQ60767.1	KAG9515256.1	97.97	591	11	1	1	590	1	591	0	1212
K07243	KEQ60767.1	KAG2170661.1	97.462	591	14	1	1	590	1	591	0	1211
K07243	KEQ60767.1	TIA52821.1	97.462	591	14	1	1	590	1	591	0	1211
K07243	KEQ60767.1	TIA80308.1	97.462	591	14	1	1	590	1	591	0	1211
K07243	KEQ60767.1	TIA56165.1	97.462	591	14	1	1	590	1	591	0	1211
K07243	KEQ60767.1	THZ77516.1	97.462	591	14	1	1	590	1	591	0	1211
K07243	KEQ60767.1	THZ37529.1	97.462	591	14	1	1	590	1	591	0	1211
K07243	KEQ60767.1	THZ02273.1	97.462	591	14	1	1	590	1	591	0	1211
K07243	KEQ60767.1	THZ28921.1	97.462	591	14	1	1	590	1	591	0	1211
K07243	KEQ60767.1	THY95737.1	97.462	591	14	1	1	590	1	591	0	1211
K07243	KEQ60767.1	THX46410.1	97.462	591	14	1	1	590	1	591	0	1211
K07243	KEQ60767.1	THX07459.1	97.462	591	14	1	1	590	1	591	0	1211
K07243	KEQ60767.1	THY69367.1	97.462	591	14	1	1	590	1	591	0	1211
K07243	KEQ60767.1	THY03689.1	97.462	591	14	1	1	590	1	591	0	1211
K07243	KEQ60767.1	THX76238.1	97.462	591	14	1	1	590	1	591	0	1211
K07243	KEQ60767.1	THX97703.1	97.462	591	14	1	1	590	1	591	0	1211
K07243	KEQ60767.1	THX32169.1	97.462	591	14	1	1	590	1	591	0	1211
K07243	KEQ60767.1	THV91212.1	97.462	591	14	1	1	590	1	591	0	1211
K07243	KEQ60767.1	THW21179.1	97.462	591	14	1	1	590	1	591	0	1211
K07243	KEQ60767.1	CAD0093542.1	97.462	591	14	1	1	590	7	597	0	1210
K07243	KEQ60767.1	TIA75703.1	97.462	591	14	1	1	590	5	595	0	1210
K07243	KEQ60767.1	THZ67363.1	97.462	591	14	1	1	590	5	595	0	1210
K07243	KEQ60767.1	THZ89869.1	97.462	591	14	1	1	590	5	595	0	1210
K07243	KEQ60767.1	TIA25755.1	97.462	591	14	1	1	590	5	595	0	1210
K07243	KEQ60767.1	TIA01264.1	97.462	591	14	1	1	590	5	595	0	1210
K07243	KEQ60767.1	THZ84646.1	97.462	591	14	1	1	590	5	595	0	1210
K07243	KEQ60767.1	THZ42992.1	97.462	591	14	1	1	590	5	595	0	1210
K07243	KEQ60767.1	THZ30640.1	97.462	591	14	1	1	590	5	595	0	1210
K07243	KEQ60767.1	THY95926.1	97.462	591	14	1	1	590	5	595	0	1210
K07243	KEQ60767.1	THY65772.1	97.462	591	14	1	1	590	5	595	0	1210
K07243	KEQ60767.1	THY18025.1	97.462	591	14	1	1	590	5	595	0	1210
K07243	KEQ60767.1	THX61874.1	97.462	591	14	1	1	590	5	595	0	1210
K07243	KEQ60767.1	THY43391.1	97.462	591	14	1	1	590	5	595	0	1210
K07243	KEQ60767.1	THY30849.1	97.462	591	14	1	1	590	5	595	0	1210
K07243	KEQ60767.1	THY33351.1	97.462	591	14	1	1	590	5	595	0	1210
K07243	KEQ60767.1	THX17116.1	97.462	591	14	1	1	590	5	595	0	1210
K07243	KEQ60767.1	THW83467.1	97.462	591	14	1	1	590	5	595	0	1210
K07243	KEQ60767.1	THX07486.1	97.462	591	14	1	1	590	5	595	0	1210
K07243	KEQ60767.1	THW62417.1	97.462	591	14	1	1	590	5	595	0	1210
K07243	KEQ60767.1	THW01974.1	97.462	591	14	1	1	590	5	595	0	1210
K07243	KEQ60767.1	THW58158.1	97.462	591	14	1	1	590	5	595	0	1210
K07243	KEQ60767.1	THW43023.1	97.462	591	14	1	1	590	5	595	0	1210
K07243	KEQ60767.1	THW26613.1	97.462	591	14	1	1	590	5	595	0	1210
K07243	KEQ60767.1	THV74999.1	97.462	591	14	1	1	590	5	595	0	1210
K07243	KEQ60767.1	KEQ78888.1	97.462	591	14	1	1	590	5	595	0	1210
K07243	KEQ60767.1	OBW68565.1	97.293	591	15	1	1	590	1	591	0	1209
K07243	KEQ60767.1	THY54315.1	97.293	591	15	1	1	590	1	591	0	1209
K07243	KEQ60767.1	THW49111.1	97.293	591	15	1	1	590	1	591	0	1209
K07243	KEQ60767.1	TIA40241.1	97.293	591	15	1	1	590	5	595	0	1208
K07243	KEQ60767.1	THX85942.1	97.293	591	15	1	1	590	5	595	0	1208
K07243	KEQ60767.1	CAD0112806.1	97.293	591	15	1	1	590	7	597	0	1208
K07243	KEQ60767.1	KEQ98766.1	97.293	591	15	1	1	590	5	595	0	1208
K07243	KEQ60767.1	CAD0057484.1	97.293	591	15	1	1	590	6	596	0	1207
K07243	KEQ60767.1	TIA22240.1	97.462	591	14	1	1	590	34	624	0	1207
K07243	KEQ60767.1	THX43437.1	97.462	591	14	1	1	590	34	624	0	1207
K07243	KEQ60767.1	THW69634.1	97.293	591	15	1	1	590	5	595	0	1207
K07243	KEQ60767.1	THV66391.1	97.293	591	15	1	1	590	5	595	0	1207
K07243	KEQ60767.1	CAD0024730.1	97.293	591	15	1	1	590	6	596	0	1207
K07243	KEQ60767.1	KAH0286936.1	97.124	591	16	1	1	590	1	591	0	1206
K07243	KEQ60767.1	KEQ76941.1	97.124	591	16	1	1	590	1	591	0	1206
K07243	KEQ60767.1	CAC9886440.1	96.154	598	15	2	1	590	5	602	0	1201
K07243	KEQ60767.1	KAG9996292.1	99.13	575	4	1	17	590	1	575	0	1191
K07243	KEQ60767.1	KAG9559385.1	98.909	550	5	1	42	590	1	550	0	1132
K07243	KEQ60767.1	CAD0012311.1	91.878	591	15	2	1	590	1	559	0	1123
K07243	KEQ60767.1	KAG9538410.1	98.456	518	8	0	1	518	2	519	0	1075
K07243	KEQ60767.1	KAG9755835.1	98.419	506	8	0	1	506	2	507	0	1051

[truncated: 35 more sheets: Ga11, Gal4, Gcr1, Gis1, Hap2, HapX, Hsf1, Ino4, LaeA, Mac1, Mat_alpha1, Mcm1, MeaB, Mig1, Msn2, NsdD, Put3, Rim101, Sko1, Smp1 …]
